1 **Mapping diversification metrics in macroecological studies: Prospects and challenges**

2

3 Julián A. Velasco<sup>1\*</sup> & Jesús N. Pinto-Ledezma<sup>2,3</sup>

4 <sup>1</sup>Museo de Zoología Alfonso L. Herrera, Facultad de Ciencias, Universidad Nacional Autónoma de  
5 México, Mexico City, Mexico.

6 <sup>2</sup>Department of Ecology, Evolution, and Behavior, University of Minnesota, 1479 Gortner Ave,  
7 Saint Paul MN 55108, United States.

8 <sup>3</sup>Museo de Historia Natural Noel Kempff Mercado, Universidad Autónoma Gabriel René Moreno,  
9 Av. Irala 565, C.C. 2489, Santa Cruz de la Sierra, Bolivia.

10

11 \*Corresponding author: [juvelas@gmail.com](mailto:juvelas@gmail.com)

12 ORCID: <https://orcid.org/0000-0002-2183-5758>

13

14

15

16 **Abstract**

17 The intersection of macroecology and macroevolution is one of the most active research areas  
18 today. Macroecological studies are increasingly using phylogenetic diversification metrics to  
19 explore the role of evolutionary processes in shaping present-day patterns of biodiversity.  
20 Evolutionary explanations of species richness gradients are key for our understanding of how  
21 diversity accumulated in a region. For instance, the present-day diversity in a region can be a  
22 result of *in situ* diversification, extinction, or colonization from other regions, or a combination of  
23 all of these processes. However, it is unknown whether these metrics capture well these  
24 diversification and dispersal processes across geography. Some metrics (e.g., mean root distance  
25 -MRD-; lineage diversification-rate -DR-; evolutionary distinctiveness -ED-) seem to provide very  
26 similar geographical patterns regardless of how they were calculated (e.g., using branch lengths  
27 or not). The lack of appropriate estimates of extinction and dispersal rates in phylogenetic trees  
28 can limit our conclusions about how species richness gradients emerged. With a review of the  
29 literature and complemented by an empirical comparison, we show that phylogenetic metrics by  
30 itself are not capturing well the speciation, extinction and dispersal processes across the  
31 geographical gradients. Furthermore, we show how new biogeographic methods can improve our  
32 inference of past events and therefore our conclusions about the evolutionary mechanisms  
33 driving regional species richness. Finally, we recommend that future studies include several  
34 approaches (e.g., spatial diversification modelling, parametric biogeographic methods) to  
35 disentangle the relative the role of speciation, extinction and dispersal in the generation and  
36 maintenance of species richness gradients.

37

- 38 Keywords: Phylogeny, Geography, Spatial diversification, Macroevolution, Species  
39 richness, Regional assemblages

## 40 Introduction

41 The causes of spatial variation of biodiversity are one of the most fundamental questions  
42 in ecology, biogeography and macroecology (Brown 1995, 2014, Brown and Lomolino 1998,  
43 Hawkins et al. 2012, Fine 2015, Jablonski et al. 2017). Current studies are integrating in a single  
44 framework the ecological and evolutionary mechanisms driving regional species diversity  
45 (McGaughan 2015, Pärtel et al. 2016, Cabral et al. 2017, Leidinger and Cabral 2017). However,  
46 only three macroevolutionary processes ultimately can modify the number of species in a region:  
47 speciation, extinction and dispersal (Wiens 2011, Fine 2015, Jablonski et al. 2017) (Figure 1). These  
48 processes can be modulated by species' traits varying within clades (Paper et al. 2016, 2017,  
49 Jezkova and Wiens 2017, Moen and Wiens 2017), age of region (e.g., time-for-speciation effect;  
50 Stephens & Wiens, 2003), geographical area (Losos and Schluter 2000), or climatic conditions  
51 (Condamine et al. 2013, Lewitus and Morlon 2017).

52 The integration of different disciplines such as molecular phylogenetics, palaeontology,  
53 and historical biogeography have allow to infer a series of macroevolutionary processes across  
54 geography (Diniz-Filho et al. 2013, Fritz et al. 2013). It is well-known that fossil information is key  
55 to estimate with high confidence rates of speciation and extinction (Sepkoski 1998, Foote 2000,  
56 Quental and Marshall 2010, Rabosky 2010b). New methods correcting for sampling bias are able  
57 to generate improvements in the estimates of the speciation, extinction and net diversification  
58 rates (Silvestro et al. 2014, 2016). However, the causal mechanisms that underlying the  
59 geographical diversity gradients only can be established with greater confidence for a few  
60 taxonomic groups with adequate fossil record, such as marine bivalves (Jablonski et al. 2006,  
61 2017), mammals (Silvestro et al. 2014) or plants (Antonelli et al. 2015).

62 As fossil data is not available or incomplete for most extant groups, model-based  
63 approaches used to estimate speciation and extinction rates in palaeontology were adapted to  
64 study the macroevolutionary dynamics using phylogenetic information (Nee et al. 1994, Morlon  
65 et al. 2010, Stadler 2013). Molecular phylogenies are becoming essential to the study of  
66 diversification dynamics across temporal and spatial scales for extant taxa (Wiens and Donoghue  
67 2004, Rabosky and Lovette 2008, Stadler 2013, Morlon 2014, Schluter and Pennell 2017).  
68 Therefore, it is possible to reconstruct past diversification process based on the branching events  
69 of a phylogeny using a set of birth-death models (Nee et al. 1994, Nee 2006, Morlon et al. 2010,  
70 Stadler 2013, Morlon 2014). These birth-death models allow infer either a homogeneous process  
71 for an entire clade (Nee et al. 1994, Magallón and Sanderson 2001) or a heterogeneous process  
72 varying in time or in specific subclades of a tree (Paper et al. 2006, Rabosky and Lovette 2008,  
73 Alfaro et al. 2009). However, these birth-death models only account for temporal variation of the  
74 macroevolutionary processes and how translate these processes to the geography is still a matter  
75 of debate.

76 Macroecological studies use two main approaches to link the estimates of diversification  
77 with the geographical ranges of species (Hawkins et al. 2007, Algar et al. 2009, Qian et al. 2014,  
78 Pinto-Ledezma et al. 2017, Velasco et al. 2018). The first one uses a set of phylogenetic metrics as  
79 a proxy to capture the geographical signature of lineage diversification dynamics (Diniz-Filho et  
80 al., 2013; Fritz et al., 2013; Table 1; Figure 2). These metrics provide either an estimate of a per-  
81 species rate of diversification (e.g., mean root distance –MRD-, residual phylogenetic diversity –  
82 rPD-, mean diversification rate –MDR-), the phylogenetic structure of regional assemblages (e.g.,  
83 phylogenetic species variability –PSV-) or the average age of co-occurring lineages in a given area  
84 (e.g., mean age; see Table 1). Each metric is calculated for each species in the phylogeny;  
85 therefore, we can associate the species' values to its corresponding geographical range and

86 generate a map with average values for cells or regions. Although these phylogenetic metrics only  
87 account for speciation events, macroecologists have used these maps as a proxy to test some  
88 evolutionary-based hypothesis in macroecological research (Diniz-Filho *et al.*, 2013; Fritz *et al.*,  
89 2013; see Table 2 for a compendium of these hypotheses).

90         The second approach used by macroecologists consists in the explicit estimation of  
91 diversification parameters across geography (Goldberg *et al.* 2005, 2011, Ramiadantsoa *et al.*  
92 2017). For instance, the geographic state speciation and extinction model –GeoSSE (Goldberg *et*  
93 *al.* 2011; Table 1) allows estimating speciation, extinction and dispersal parameters across two  
94 regions. It is possible to disentangle the relative role of each one of these processes on the  
95 generation and maintenance of the geographical diversity gradients (Rolland *et al.* 2014, Pulido-  
96 Santacruz and Weir 2016, Pinto-Ledezma *et al.* 2017). In addition, a recently developed Bayesian  
97 approach (BAMM; Rabosky 2014, Rabosky *et al.* 2014) allows to infer the balance of speciation  
98 and extinction in the generation of these biodiversity gradients (Rabosky *et al.* 2015, Sánchez-  
99 Ramírez *et al.* 2015, Morinière *et al.* 2016, Pinto-Ledezma *et al.* 2017). The BAMM approach allows  
100 both the inference of macroevolutionary dynamics for an entire clade (i.e., a macroevolutionary  
101 regime; Rabosky 2014) and also get estimates of per-species diversification rates (i.e., as a  
102 phylogenetic metric; Rabosky 2016) that can be mapped in a geographical domain. Although all  
103 these methods aim to obtain a geographical picture of the diversification processes, it remains  
104 unexplored if they can effectively capture these dynamics across regions.

105         In this paper, we conducted a review on macroecological literature to evaluate how  
106 evolutionary and biogeographic processes contribute to shape geographical species richness  
107 gradients. We review only those papers that make explicit use of phylogenetic metrics and/or  
108 explicit diversification approaches (Table 1). We divided our review in three main sections. In the

109 first one, we discuss how studies use phylogenetic metric to test some evolutionary-based  
110 hypotheses underlying geographical diversity gradients and we explore some limitations of these  
111 metrics (see also Table 2). Also, we discuss to what extent these metrics are able to capture  
112 macroevolutionary dynamics in a spatial explicit context. We illustrate these using three case  
113 studies (Furnariides birds, Hylid frogs, and *Anolis* lizards; Figure 1) and explore how another  
114 approaches (e.g., diversification modelling and biogeographical approaches) can complement our  
115 inferences about diversification process across geography. In the second section, we discuss how  
116 dispersal and extinction processes are limiting these diversification inferences and we propose  
117 some research avenues to attempt to solve these problems. Using an explicit biogeographical  
118 approach, we test the role of dispersal on the geographical species richness patterns of the three  
119 case studies. Finally, in the third section, we call for the adoption of complementary approaches  
120 (e.g., extensive simulations, parametric biogeographical methods) in macroecological research  
121 with the aim to evaluate the relative role of speciation, extinction and dispersal process driving  
122 geographical biodiversity gradients.

123

## 124 **LITERATURE REVIEW**

125 We conducted a literature search in Web of Science for studies that explicitly have  
126 addressed questions on how speciation, extinction and dispersal have shaped geographical  
127 species richness gradients. We selected those papers that used either phylogenetic metrics (e.g.,  
128 mean root distance -MRD-, phylogenetic diversity -PD-, phylogenetic species variability -PSV-;  
129 diversification rate -DR-; mean Ages; Table 1) or explicit macroevolutionary approaches (e.g.,  
130 GeoSSE, BAMM; Goldberg *et al.*, 2011; Rabosky 2014). We compiled a list of 44 papers (Table A1),

131 but we are aware that this likely is not an exhaustive search. The majority of papers reviewed are  
132 testing historical process shaping latitudinal diversity gradients (LDG) in various taxa.

133

134 ***TESTING EVOLUTIONARY HYPOTHESIS USING PHYLOGENETIC METRICS AND EXPLICIT***  
135 ***DIVERSIFICATION APPROACHES***

136 Here, we discuss how phylogenetic metrics are used to test evolutionary hypotheses  
137 related to the generation and maintenance of geographical diversity. Several studies used the  
138 mean root distance -MRD- metric to evaluate whether regional assemblages are composed of  
139 “basal” or “derivate” lineages. First, this terminology should be avoided because it provides an  
140 incorrect interpretation of the phylogenetic trees (Baum et al. 2005, Crisp and Cook 2005,  
141 Omland et al. 2008). Although this metric does not incorporate information from branch lengths  
142 (Algar et al. 2009, Qian et al. 2015), it does provide the average number of nodes separating each  
143 species in a given region from the root of the phylogeny (Kerr and Currie 1999). MRD therefore  
144 provides information about the number of cladogenetic events (splits) that have occurred through  
145 the history of co-occurring lineages in each region (Pinto-Ledezma et al. 2017, Velasco et al.  
146 2018). Under this view, MRD should be interpreted as a metric of total diversification (Rabosky  
147 2009), where high MRD values indicating regional assemblages dominated by extensive  
148 cladogenesis and low MRD values indicating assemblages with few cladogenetic events. A main  
149 concern with this metric concern with the fact that it does not provide any information about  
150 what macroevolutionary dynamics have taken place in a region. For example, it is very hard to  
151 establish whether MRD allows to distinguish between diversity-dependent (Rabosky 2009,  
152 Rabosky and Hurlbert 2015) or time-dependent (Wiens 2011, Harmon and Harrison 2015)  
153 processes dominating regional diversity. Although the distinction between these two dynamics,



154 and its relationship with the origin and maintenance of regional diversity, is an intense topic in the  
155 macroevolutionary literature (Rabosky 2009, 2013, Wiens 2011, Cornell 2013, Harmon and  
156 Harrison 2015, Rabosky and Hurlbert 2015). However, more empirical and theoretical work is  
157 necessary to establish what scenario plays a significant role in regional species richness assembly  
158 (Rabosky 2012, Etienne et al. 2012, Valente et al. 2015, Graham et al. 2018). It might worth to  
159 establish whether local ecological process scaling up to regional scales or emergent effects (i.e.,  
160 the existence of a strong equilibrium process) governed the build-up of regional diversity (Cornell  
161 2013, Harmon and Harrison 2015, Rabosky and Hurlbert 2015, Marshall and Quental 2016).

162         The time-for-species effect hypothesis state that the regional build-up of species richness  
163 is directly proportional to the colonization time of its constituent clades (Stephens and Wiens  
164 2003b; Table 2). However, many phylogenetic metrics used to test this hypothesis, did not  
165 incorporate any age information (Fritz and Rahbek 2012, Qian et al. 2015). Qian et al. (2015) did  
166 some additional predictions for the time effect hypothesis regarding the phylogenetic structure of  
167 regional assemblages. We suggest that these predictions are not easily deduced from the original  
168 statement of the time-for-speciation effect hypothesis (Stephens & Wiens 2003). For instance,  
169 Qian et al. (2015, p. 7) predicted that regions with low species richness (e.g., extra-tropical  
170 regions) should be composed of more closely related species than regions with high species  
171 richness (e.g., tropical regions). This assumes that regions with low species richness were  
172 colonized recently and therefore these lineages had little time for speciation. However, it is also  
173 plausible consider that high extinction occurred in these poor species richness regions by  
174 marginal climatic niche conditions preventing adaptive diversification (Wellborn and Langerhans  
175 2015). By contrast, regions with high species richness might also be assembled by multiple  
176 dispersals from nearby regions becoming to be a macroevolutionary sink (Goldberg et al. 2005). In  
177 this latter case, the species richness was not build-up by *in situ* speciation mainly but by continued

178 dispersal through time. To evaluate which of these scenarios is more plausible it is necessary to  
179 adopt an approach that explicitly infer the number of the dispersal and cladogenetic events across  
180 areas (Roy and Goldberg 2007, Dupin et al. 2017).

181 Differences in species diversification are also considered as a main driver of the  
182 geographical diversity gradient for many groups (Kennedy et al. 2014, Pinto-Ledezma et al. 2017).  
183 This hypothesis states (Table 2) that differences in net diversification rates between areas are the  
184 main driver of differences in regional species richness between areas. Davies and Buckley (2011)  
185 used the phylogenetic diversity controlled by species richness (i.e., residual PD –rPD-) to  
186 distinguish areas with different evolutionary processes. These authors predicted that areas where  
187 rapid speciation and low immigration events from other areas occurred, are dominated by large  
188 adaptive radiations (e.g., large islands; Losos and Schluter 2000). By contrast, areas with slow  
189 speciation and colonized by multiple lineages through time should have high values of residual  
190 PD.

191 The “out of the tropics” -OTT- hypothesis (Jablonski et al. 2006; Table 2) states that  
192 latitudinal diversity gradient is due to that the majority of lineages originated in the tropics and  
193 then migrated to extratropical regions. Under this hypothesis, tropics harbour higher net  
194 diversification rates (higher speciation and lower extinction) than extratropical regions and  
195 dispersal rates are higher from the tropics to extratropical regions than the reverse (Jablonski et  
196 al. 2006; Table 1). For instance, Rolland et al. (2014) used the GeoSSE model to test this  
197 hypothesis in the generation of the latitudinal mammal diversity gradient. They found that net  
198 diversification rates (i.e., the balance of speciation minus extinction) was higher in tropical than in  
199 temperate regions and dispersal rates were higher from the tropics to temperate regions than the  
200 reverse. Also, Pinto-Ledezma et al. (2017) used the GeoSSE model to test an analogue hypothesis  
201 to OTT, as form of Out of the Forest hypothesis (OTF), using Furnariides birds as a clade model.

202 Their favoured a model where open areas have higher speciation, extinction and dispersal rates  
203 than forest habitats. All these results suggest that it is reasonable to use either phylogenetic  
204 metrics or explicit diversification approaches (e.g., the GeoSSE model) to evaluate a set of  
205 evolutionary-based hypotheses as a main driver of geographical diversity gradients. However, we  
206 show here (see below) that these approaches fail to capture the evolutionary and biogeographic  
207 processes at spatial scales.

208

### 209 ***Are phylogenetic metrics capturing well the diversification process across geography?***

210 A deep understanding of evolutionary processes affecting regional species assemblages is  
211 coming from the integration of molecular phylogenies and fossil record (Quental and Marshall  
212 2010, Marshall 2017). From this integration of neontological and paleontological perspectives, it is  
213 clear that both approaches are necessary to test evolutionary-based hypothesis in  
214 macroecological research. Several hypotheses were proposed to explain geographical diversity  
215 patterns, particularly the latitudinal diversity gradient –LDG- (see Table 2 for a summary and  
216 compilation of the main hypotheses reported in the literature). Although the ideal approach is to  
217 generate robust conclusions from multiple lines of evidence (e.g., fossil record, molecular  
218 phylogenies, biogeographical inference) it is clear that this information is scarce for many  
219 taxonomic groups. Many macroecological studies have adopted either phylogenetic metrics or  
220 explicit diversification approaches (e.g., the GeoSSE model) to evaluate the relative contribution  
221 of speciation, extinction and dispersal on the resulting geographical diversity gradients (Table S1).

222 Phylogenetic metrics can be easily visualized in a geographical context and several  
223 inferences about ecological (e.g., dispersal) and evolutionary (e.g., speciation) process can be

224 done. As these metrics provide a *per-species level diversification* metric for each species in a  
225 phylogeny, it is possible to associate these values with the corresponding species' geographical  
226 range and obtain a mean value for cells or regions in a given geographical domain (Table 1; Figure  
227 2). By contrast, explicit diversification approaches (e.g., GeoSSE; BAMM; fitting models) provide a  
228 *per-lineage level diversification* metric for a given clade or a regional assemblage (Rabosky 2016a).  
229 However, in some cases, it is possible to generate a *per-species level diversification* metric with  
230 these approaches. For instance, Pérez-Escobar et al. (2017) used the function GetTipsRates in  
231 BAMMtools (Rabosky et al. 2014) to map speciation rates for Neotropical orchids.

232         These two approaches (phylogenetic metrics and lineage diversification) potentially can  
233 provide complementary pictures about how macroevolutionary dynamics have taken place in the  
234 geography. On the one hand, it is possible to estimate diversification rates for a given clade  
235 using the number of species, its age and a birth-death models (Magallón and Sanderson 2001,  
236 Nee 2006, Sánchez-Reyes et al. 2017). These model-fitting approaches allow to whether diversity-  
237 or time-dependent diversification process has taken place in a regional assemblage (Etienne et al.  
238 2012, Rabosky 2014, Valente et al. 2015). On the other hand, per-species diversification rate  
239 metrics allow establishing the potential of each individual species to generate more species (Jetz  
240 et al. 2012, Rabosky 2014, 2016a). However, these approaches imply at least a different process,  
241 which left a different signature on the geography. Phylogenetic metrics captures a total  
242 diversification process (Rabosky 2009), whereas lineage diversification approaches (e.g., BAMM)  
243 can potentially provide information about an individual diversification process (Rabosky 2013). In  
244 addition, still is not clear whether phylogenetic metrics can provide an accurate description of the  
245 diversification dynamics across geography.

246         The first step to clarify how well these phylogenetic metrics behave is to establish a  
247 comparison within and between different taxonomic groups. To evaluate how different

248 phylogenetic metrics vary across geography and their relationship with species richness, we used  
249 two empirical data sets from our own empirical work (furnariid birds and anole lizards; (Pinto-  
250 Ledezma et al. 2017, Velasco et al. 2018) and a data set compiled from several sources (hylid  
251 frogs; (Wiens et al. 2006, Algar et al. 2009, Pyron 2014a). We mapped across geography five  
252 phylogenetic metrics (Table 1, Figure 2). We selected these three data sets because previous work  
253 analysed how evolutionary-based hypotheses affected the present-day species richness gradient  
254 (Wiens et al. 2006, Algar et al. 2009, Pinto-Ledezma et al. 2017, Velasco et al. 2018).

255 Figure 2 shows the geographical pattern of species richness and the five phylogenetic metrics  
256 for *Anolis* lizards, hylid frogs and Furnariides birds. For all clades, there is a higher species  
257 concentration near to the Ecuador. Higher species concentration for hylids and Furnariides can be  
258 found in the Amazon and the Atlantic forest and for *Anolis* lizards in Central America and the  
259 Caribe (Figure 2A-C; see also Algar et al. 2009, Pinto-Ledezma et al. 2017, and Velasco et al. 2018,  
260 for a detailed description of the geographical species richness pattern for these clades,  
261 respectively). In terms of the geographical pattern of each phylogenetic metric (Figure 2D-R), in  
262 most of the cases cells with higher metric values are related to cells that contain high species  
263 richness and vice versa (Figure 2D-R; Figure A1). However, the degree and the direction of this  
264 relationship changes according to the phylogenetic metric used. For example, MRD, a metric of  
265 species derivedness, shows a negative correlation with species richness (Figure 2J-L; Figure A1).  
266 Importantly, the spatial relationships between species richness and phylogenetic metrics found in  
267 our analysis could simply be the result of aggregated species-level attributes within cells or  
268 assemblages (Hawkins et al. 2017). Hence, any conclusion derived from these relationships needs  
269 to be considered carefully. In addition, there are different levels of correlation between  
270 phylogenetic metrics (Figure A1). For example, MDR - MA present a high but negative correlation,  
271 and rPD - PSV and MRD - MDR present a mid-high positive correlation (Figure A1). Although

272 there are few studies comparing correlations between metrics (Vellend et al. 2010, Miller et al.  
273 2017), to our knowledge, none previous study compares the similarity of these diversification  
274 metrics (Table 1). However, some of these metrics sharing mathematical assumptions, which  
275 increase the likelihood of correlation between them. For example, for ultrametric trees, metrics as  
276 MDR could be approximated by considering the mean root distance (i.e. MRD metric) from the  
277 tips to the root (Freckleton et al. 2008), so further studies exploring the mathematical relation  
278 between metrics are needed.

279 In order to assess if the cells/assemblages on average do not represent a random sampling  
280 from the species pool, we applied a simple permutation test to explore the non-randomness in  
281 each of the phylogenetic metrics. We applied a null model where the presence-absence matrix  
282 (i.e., PAM) was randomly shuffled 1000 times, but maintaining the frequency of species  
283 occurrence and observed richness in the cells/assemblages (Gotelli 2000). This kind of null model  
284 is standard in studies at the community/assemblage level that use phylogenetic information  
285 (Cavender-Bares et al. 2004, 2006). Interestingly, none of the phylogenetic metrics deviates from  
286 the null expectation for the three clades (Figure 3). Also, very few cells/assemblages present p-  
287 values below the 0.05 threshold, thus indicating that the cells/assemblages present random  
288 association among species (Figure 3). These results should be supported by repeating analyses  
289 with more clades at different spatial extents, but again, we stress that any result obtained with  
290 the use of phylogenetic metrics need to be interpreted carefully.

291

292 ***A brief comparison between phylogenetic metrics and explicit diversification and***  
293 ***biogeographic approaches***

294 We compared the phylogenetic metrics enunciated in Table 1, which have been the  
295 most used in macroecological research. We explored whether the geographical patterns of these  
296 phylogenetic metrics in three empirical examples coincide with the macroevolutionary dynamics  
297 inferred using explicit modelling diversification approaches. In particular, we implemented the  
298 GeoSSE model to estimate the three parameters (speciation, extinction, and dispersal) between  
299 two areas in each taxonomic group (Table 3 and 4). In addition, we used the BAMM approach to  
300 generate the per-species level diversification metric implemented in the software BAMM 2.5.0  
301 (Rabosky 2014). In the following section, we discuss each metric and we compare them with the  
302 explicit diversification approaches.

303

304 *Residual Phylogenetic Diversity (rPD)*

305 In the case of furnariid birds, we show that forest areas tend to exhibit slightly higher  
306 values of rPD in contrast with open areas (Figure 4; see also Figure 2). According to Davies and  
307 Buckley's logic, these areas exhibit slow diversification and frequent dispersal from open areas.  
308 Pinto-Ledezma et al. (2017) using GeoSSE and BAMM approaches indicated that open areas  
309 exhibit higher net diversification rates than open areas (Table 3). For hylid frogs, we found that  
310 tropical areas tend to exhibit higher rPD values than extratropical regions (Figure 5). However, by  
311 adopting an explicit diversification approach (GeoSSE and BAMM), we found that net  
312 diversification rates were similar in both regions (Table 3). In the case of *Anolis* lizards, the rPD  
313 values were higher in the continent than in the island areas (Figure 6). However, using GeoSSE

314 and BMM, we found that both rates were similar (Table 3). In a recent paper, Poe et al. (in press)  
315 also found that macroevolutionary rates are similar between insular and mainland clades. All  
316 these results suggest that rPD likely does not provide an accurate signature of the  
317 macroevolutionary dynamic at spatial scales. In fact, it seems that rPD tends to overestimate  
318 differences between regions when a stationary diversification process is occurring across  
319 geography. A potential solution might be rethinking the way in which we visualize rPD across  
320 geography in contrast with the original meaning by Davies & Buckley (2011; see also Forest et al.  
321 2007).

322

### 323 *Mean root distance (MRD)*

324 As we discussed, *MRD* captures a total diversification value portraying the number of  
325 cladogenetic events co-occurring in a given region. In the case of furnariid birds, we found that  
326 *MRD* values tend to be higher in open than forest areas (Figure 4). Accordingly, this metric  
327 suggests that more cladogenetic events were accumulated in open areas (i.e., more total  
328 diversification; Rabosky 2009). Therefore, this metric, for this bird clade, is consistent with results  
329 from explicit diversification approaches (Table 3). For hylid frogs, it seems that there are no  
330 differences in *MRD* values between extratropics and tropics areas (Figure 5). However, tropical  
331 areas have some cells with very high values. Again, *MRD* provide an accurate description of the  
332 total diversification pattern in this clade across the latitudinal gradient. In *Anolis* lizards, we found  
333 that *MDR* values tend to be lower in islands in comparison with mainland areas (Figure 6). In this  
334 case, *MRD* did not provide an accurate description of the evolutionary processes occurring  
335 between the mainland and insular anole assemblages. However, there is also a high probability  
336 that the high *MRD* values in the mainland are a direct reflect of an idiosyncratic evolutionary



337 trajectory of each one of the two clades that radiated there (i.e., *Draconura* and *Dactyloa* clade;  
338 see Poe et al. 2017, Velasco et al. 2018). These two clades seems to exhibit differential  
339 diversification dynamics across geography (Velasco et al. 2018) but further research might be  
340 necessary to evaluate these differences.

341

#### 342 *Phylogenetic species variability (PSV)*

343         The PSV metric provides information about how related are the species in a given  
344 regional assemblage. In hylid frogs, we found that tropical assemblages tend to be composed of  
345 more related species than extratropical assemblages (Figure 5). Hylid assemblages in  
346 extratropical areas are composed of multiple lineages that dispersed from tropical areas and then  
347 diversified there. We found higher dispersal rates from tropical to temperate regions than vice  
348 versa (Table 3 and 4). The same tendency is present in the case of furnariid birds where open  
349 areas exhibit higher PSV values than forest areas (Figure 4) and dispersal rates were higher from  
350 open to forest areas than the reverse (Table 3). By contrast, we did not find any evidence for  
351 differences in PSV values between island and mainland *Anolis* assemblages (Figure 6). In addition,  
352 the dispersal rates were very low between these two regions (Table 3; Poe et al. 2017). All these  
353 results confirm that the PSV metric can provide some insights about how dispersal process have  
354 shaped regional assemblages. We find evidence that low PSV values (i.e., phylogenetically over-  
355 dispersed faunas) are influenced by multiple dispersals along its evolutionary history.

356

#### 357 *Mean diversification rate (MDR)*

358           Jetz et al. (2012) proposed MDR metric as a species-level speciation rate metric based in  
359 the branch length along the path from the root of a tree to each individual species. In furnariid  
360 birds, we noted that MDR was slightly higher in open versus forest areas and the same pattern is  
361 present using the BAMM approach (Pinto-Ledezma et al. 2017; Figure 5; Table 3). For hylid frogs,  
362 extratropical regions tend to exhibit higher values than tropical regions (Figure 5). MDR seems to  
363 capture well the differences in macroevolutionary diversification for these taxa along the  
364 latitudinal diversity gradient. A similar pattern is present when the BAMM approach is used (Table  
365 3). We consider that both metrics (MDR vs per-species diversification rate from BAMM) leave the  
366 same signature in the geography. In *Anolis*, we found that insular assemblages tend to exhibit  
367 higher MDR values than continental assemblages (Figure 6), However, there is no difference in  
368 the macroevolutionary dynamic between these two areas for the *Anolis* lizards clade (Poe et al. in  
369 press, Velasco et al. 2018).

370

371 *Mean ages (MA).*

372           The average of ages of co-occurring lineages are used to test evolutionary hypothesis  
373 about whether a region maintains older lineages than others (e.g., a museum) or a combination of  
374 old and recent lineages (e.g., OTT hypothesis, Table 1). Although this metric does not provide any  
375 inference of the ancestral area of the clade, it is possible to implement an explicit biogeographic  
376 approach to test this (see below). For example, in hylid frogs, we found that extratropical areas  
377 are composed of older lineages than tropical regions (Figure 5). The biogeographic parametric  
378 approach infers this same area as ancestral for the entire lineage (Figure A2). In furnariid birds,  
379 mean ages metric revealed that older lineages have accumulated more in forest than open areas  
380 (Figure 4). In accordance, the ancestral area inferred with a parametric biogeographic method

381 was the forest area (Figure A<sub>3</sub>). In the case of the anole lizards, insular settings tend to be  
382 composed of older lineages than continents. However, the ancestral area for the entire anole  
383 clade is the mainland, particularly South America (Poe et al. 2017). The mainland *Anolis* radiation  
384 is composed of two clades, one clade that originated in South America (the *Dactyloa* clade; Poe et  
385 al. 2017) and colonized Caribbean islands, and the other clade (the *Norops* clade; Poe et al. 2017)  
386 that originated in the Caribbean islands and then colonized back the mainland in Middle America  
387 and then dispersed to South America. Therefore, the biogeographical history of the *Anolis*  
388 radiation is complex and involves multiple dispersals between islands and mainland areas (Poe et  
389 al. 2017; Figure A<sub>4</sub>). In general, mean ages does not provide enough information about the  
390 biogeographic origin and maintenance of a clade. This happens because multiple dispersals and *in*  
391 *situ* cladogenesis might erase any simplistic pattern elucidated for this metric, as found in the  
392 case of the *Anolis* lizards.

393

394 ***HOW DISPERSAL AND EXTINCTION AFFECT INFERENCES OF GEOGRAPHICAL***  
395 ***DIVERSIFICATION GRADIENTS?***

396 Dispersal is another key macroevolutionary process that ultimately determines the number of a  
397 species in a region (Roy and Goldberg 2007, Eiserhardt et al. 2013, Rolland et al. 2014, Chazot et  
398 al. 2016). However, few studies evaluated explicitly how the direction of dispersals between  
399 region contributes to the generation of regional differences between areas (Chown and Gaston  
400 2000, Goldberg et al. 2005, 2011, Jablonski et al. 2006). Roy and Goldberg (2007) showed with  
401 simulations that dispersal asymmetry between areas had a strong impact in the regional species  
402 richness and the average age of these lineages. Accordingly, phylogenetic metrics can be  
403 sensitive to dispersal between areas because it is impossible to distinguish which lineages

404 originated by *in situ* speciation or simply due to dispersal from nearby areas. Goldberg et al. (2011)  
405 developed the GeoSSE model to evaluate how range evolution affected diversification rates in a  
406 phylogenetic comparative approach. The GeoSSE model only considers three states (A: endemic  
407 species to a region; B: endemic species to another region; and AB for widespread species) and  
408 makes a series of assumptions that can be problematic. The first assumption of the GeoSSE  
409 model is that a time-dependent process dominates the diversification dynamic in each region  
410 (Stephens and Wiens 2003, Wiens 2011). This assumption conflicts with a diversity-dependent  
411 process assumption and this debate is far from being resolved (Cornell 2013, Harmon and  
412 Harrison 2015, Rabosky and Hurlbert 2015). The second problematic assumption has to do with  
413 the fact that the GeoSSE model consider dispersal rates as stable through time and lineages. In  
414 other words, the dispersal ability and therefore the frequency of transitions between areas are  
415 constant across the evolutionary history of a clade. There are many empirical evidence showing  
416 that dispersal rates vary across time and space among lineages (McPeck and Holt 1992,  
417 Sanmartín et al. 2008, Robledo-Arnuncio et al. 2014).

418         Regardless of these major assumptions, the GeoSSE model has been adopted to evaluate  
419 relative contributions of speciation, extinction and dispersal to the generation of species richness  
420 gradients (e.g., Rolland et al. 2014, Pyron 2014b, Staggemeier et al. 2015, Looney et al. 2016,  
421 Morinière et al. 2016, Pulido-Santacruz and Weir 2016, Alves et al. 2017, Hutter et al. 2017, Pinto-  
422 Ledezma et al. 2017). In a recent study, Rabosky and Goldberg (2015) found that state-dependent  
423 diversification models tend to inflate excessively the false discovery rates (i.e., type I error rates).  
424 In particular, Rabosky and Goldberg (2015) found that these models tend to find false associations  
425 between trait shifts and shifts in macroevolutionary dynamics. Although the Rabosky and  
426 Goldberg's study was not based on the GeoSSE model, it is clear that transitions between areas  
427 (i.e., dispersal events) can be falsely associated with shifts in speciation and extinction rates

428 across the phylogeny. Alves et al. (2017) also found that geographical uncertainties in the  
429 assignment of species to a given area affect the parameter estimates (i.e., speciation, extinction  
430 and dispersal rates) in the GeoSSE model. Same authors also evaluated how incorrect  
431 assignments of bat species to tropical or extra-tropical regions can generate erroneous  
432 conclusions about the relative role of speciation, extinction and dispersal on a latitudinal diversity  
433 gradient. From these studies, it is clear that dispersal is a major issue that needs to be evaluated  
434 explicitly in macroecological studies.

435 Pulido-Santacruz and Weir (2016) also used the GeoSSE model to disentangle the relative  
436 effect of speciation, extinction and dispersal on the latitudinal bird diversity gradient. They found  
437 that extinction was prevalent across all bird clades and therefore they suggest this as a main  
438 driver of the geographical bird diversity gradient. Pyron (2014c), also using the GeoSSE model,  
439 found that temperate diversity in reptiles is due to higher extinction in these areas. We consider  
440 that extinction inferences from the GeoSSE model should be treated with caution. For the few  
441 clades where fossil record is abundant (e.g., marine bivalves; Jablonski et al. 2006), studies point  
442 out to conclude that extinction differences between regions should be treated with caution due to  
443 the potential sampling bias (Jablonski et al. 2006, 2017). In addition, studies based on extensive  
444 simulations found that extinction inferences based only in molecular phylogenies are not reliable  
445 (Rabosky 2010a, 2016b, Quental and Marshall 2010), although extinction rates can be estimated  
446 relatively well using medium to large phylogenies (Beaulieu & O'Meara 2015).

447 In a recent review, Sanmartín and Meseguer (2016) proposed that it is possible to detect the  
448 extinction signature in molecular phylogenies using extensive simulations and lineage-through-  
449 time –LTT- plots (see also Antonelli and Sanmartín 2011). These authors also found that many  
450 birth-death models leave a similar phylogenetic imprint, which make indistinguishable some

451 scenarios. In addition, extinction events can affect substantially the ancestral range estimates,  
452 and therefore dispersal and extinction parameters in several parametric biogeographic methods  
453 (e.g., Dispersal-Vicariance –DIVA- and Dispersal-Extinction-Cladogenesis –DEC- models;  
454 Ronquist 1997, Ree et al. 2005). Sanmartín and Meseguer (2016) finally proposed that the  
455 adoption of a hierarchical Bayesian approach using continuous-time Markov Chain models will  
456 allow a better estimation of extinction both in geography and in the phylogeny (Sanmartín et al.  
457 2008, Sanmartin et al. 2010).

458         Recently, Rabosky and Goldberg (2017) developed a semi-parametric method (FiSSE) to  
459 correct the statistical problems found in BiSSE models by themselves in a previous paper  
460 (Rabosky and Goldberg 2015). However, the FiSSE method does not allow the evaluation of the  
461 contribution of dispersal on regional species richness. In any case, the best suitable framework to  
462 estimate relative contributions of speciation, extinction and dispersal might be the GeoSSE  
463 model (or parametric biogeographic models; e.g., Matzke 2014; see below), although it requires  
464 the simulation of a series of null scenarios to evaluate the statistical power in each case (see Alves  
465 et al. 2017, Pinto-Ledezma et al. 2017 for a few examples). For instance, Pinto-Ledezma et al.  
466 (2017) developed a parametric bootstrapping approach simulating traits to evaluate whether  
467 empirical inferences are different from the simulated. They simulated 100 datasets of neutral  
468 characters along a set of empirical phylogenies and using this new information repeated the same  
469 procedure with empirical data (see Appendix S1 in Pinto-Ledezma et al. 2017 for details of the  
470 bootstrapping approach). This bootstrapping procedure assumes no direct effect of the  
471 geographic character states on the parameter estimations (Feldman et al. 2016, Pinto-Ledezma  
472 et al. 2017).

473 Finally, it should be clear that more research would be necessary to establish how  
474 extinction affect estimation parameters in state-dependent diversification approaches (e.g., the  
475 GeoSSE model). For instance, the inclusion-exclusion of extinct species in simulated phylogenies  
476 using birth-death models could substantially affect the geographical inferences of speciation,  
477 extinction and dispersal parameters in the GeoSEE model. This kind of approach might provide  
478 some lights on how to biased can be the parameter estimates with only molecular phylogenies  
479 using the GeoSSE model or any other modeling approach.

480

#### 481 ***Parametric biogeographical approaches in macroecological studies.***

482 The use of parametric biogeographic approaches is an optimal solution to estimate  
483 dispersals across time and space (Matzke 2014, Dupin et al. 2017). These methods are promising  
484 in identifying the relative roles of cladogenetic and anagenetic processes shaping regional species  
485 richness. Recently, Dupin et al. (2017) developed a biogeographical stochastic mapping to infer  
486 the number of dispersals, and other biogeographical events, in the evolutionary history of  
487 Solanaceae plants across the world. This approach allows the inference from multiple process  
488 including sympatric speciation, allopatric speciation, founder-event speciation, range expansion  
489 (i.e., dispersal without speciation) and local extinction (i.e., range contractions) based on a time-  
490 calibrated phylogenetic tree and the occurrence of species in geographical regions (see also  
491 Matzke 2014 for more detailed description of the method). These explicit biogeographical  
492 approaches are promising in macroecological studies since they allow to test simultaneously a set  
493 of evolutionary process during the diversification of a clade in a region (Velasco 2018). In addition,  
494 with these new approaches it is possible to differentiate effectively between macroevolutionary  
495 sources and sink areas (Goldberg et al. 2005, Castroviejo-Fisher et al. 2014, Poe et al. 2017). For

496 instance, Poe et al. (2017) used a parametric biogeographical approach to estimate the number of  
497 events among regions and distinguish those areas where many cladogenetic events occurred (i.e.,  
498 *in situ* speciation) and areas where almost all its diversity was build-up from extensive  
499 colonization of other regions.

500         The biogeographical stochastic mapping (BSM) method developed by Dupin et al. (2017)  
501 is promising to estimate more accurately the number of dispersal events between regions based  
502 on a better estimation of the ancestral area for a clade. We evaluated how dispersal rates  
503 between regions can affect inferences drawn only from phylogenetic metrics in our three data  
504 sets. We implemented GeoSSE and BSM approaches for each data set (Table 3 and 4). For the  
505 case of hylid frogs, we counted the inferred number of dispersal events between tropical and  
506 extra-tropical regions in the Americas (Table 3; see also (Wiens et al. 2006, Algar et al. 2009). For  
507 furnariid birds, we counted the number of dispersal events between open and forest areas (Table  
508 3; see also Pinto-Ledezma et al. 2017). Finally, for anole lizards, we counted the number of  
509 dispersal events between insular and mainland areas (Table 3; see also Algar and Losos 2011, Poe  
510 et al. 2017, Velasco et al. 2018).

511         Using biogeographical stochastic mapping –BSM–, we inferred the number of dispersal  
512 events from one region to another for each one of the three taxonomic groups examined (Table  
513 3). The BSM approach allows us to disentangle which dispersals were only range expansions and  
514 which dispersals generated a speciation event (i.e., a founder-event speciation; (Barton and  
515 Charlesworth 1984, Templeton 2008). For furnariid birds, we found that range expansions were  
516 three times higher from forest areas to open areas than the reverse and founder events were  
517 twice higher from forest to open areas than the opposite (Table 3). This result suggests that  
518 differences in species richness between forest and open areas are due by recurrent dispersal



519 events along the furnariid diversification history (Pinto-Ledezma et al. 2017). Pinto-Ledezma et al.  
520 (2017) found a similar result using the GeoSSE approach, but they conducted a parametric  
521 simulation approach to evaluate whether there was a direct effect of the geographic location on  
522 the parameter estimates. Their results show that the GeoSSE approach, in this case, had limited  
523 power to detect a signature of geographic region on speciation, extinction and dispersal rates.  
524 With the implementation of the BSM approach here, we corroborate Pinto-Ledezma et al.'s  
525 findings with improved statistical power. In the case of hylid frogs and the transitions between  
526 tropical and extra-tropical areas, we found that the BSM approach inferred more dispersal events  
527 from tropical to extra-tropical regions (Table 3 and 4). However, the number of founder events  
528 was relatively low in comparison with range expansions (Table 3). These results suggest that few  
529 dispersal events have occurred across the diversification of hylid frogs and corroborate that the  
530 species richness in each region largely originated by *in situ* speciation modulated by climatic  
531 factors (Wiens et al. 2006, Algar et al. 2009). Finally, for *Anolis* lizards, we found that dispersal  
532 events between insular and mainland regions were relatively low (Table 3 and 4). We did not find  
533 evidence of any expansion range events from mainland to island or vice versa. This also  
534 corroborates previous findings that evolutionary radiation of anole in insular and mainland  
535 settings is due to extensive *in situ* diversification (Poe et al. in press, 2017, Algar and Losos 2011).

536         These results point out that the BSM approach (Dupin et al. 2017) is a promising approach  
537 when we are interested in testing the role of anagenetic and cladogenetic events on the resulting  
538 geographical species richness gradients. Although parametric biogeographic approaches are still  
539 in their infancy (Sanmartín 2012, Matzke 2014, Dupin et al. 2017), these methods allow us to  
540 evaluate macroevolutionary dynamics (i.e., speciation and extinction) in an explicit geographical  
541 context. These methods are statistical powerful and make use of a series of explicit geographic  
542 range evolution models (Velasco 2018).

543

544 ***TOWARD AN INTEGRATION OF BIOGEOGRAPHICAL AND SPECIES DIVERSIFICATION***  
545 ***APPROACHES IN MACROECOLOGICAL STUDIES.***

546         Although different parametric biogeographic methods have been developing at least for  
547 the last 20 years (Ronquist 1997, Ree et al. 2005, Landis et al. 2013, Matzke 2014, Dupin et al.  
548 2017), the adoption of these methods to test evolutionary-based hypotheses underlying  
549 geographical diversity gradient has been rare. For instance, few studies examined here tested  
550 the effect of dispersal events in the generation of regional species richness assemblages. It should  
551 clear that the current paradigm in biogeography makes a call for an evaluation of the relative  
552 frequency of cladogenetic and anagenetic process during the biogeographical history of lineages.  
553 The adoption of parametric approaches in future macroecological studies will contribute to an  
554 improvement of the estimation of speciation, extinction and dispersal processes as drivers of the  
555 geographical diversity gradients. In addition, we also think that it is necessary to establish which  
556 macroevolutionary dynamics govern regional assemblages. Phylogenetic approaches based on  
557 fitting diversification models help to test whether regional species richness is due to diversity  
558 dependence (i.e., ecological limits), time dependence, or environmental factors (Rabosky and  
559 Lovette 2008, Etienne et al. 2012, Etienne and Haegeman 2012, Condamine et al. 2013). We also  
560 stress that the adoption of many approaches providing multiple lines of evidence will help to  
561 disentangle the evolutionary and ecological causes of biodiversity gradients. Some recent studies  
562 have pointed toward this strategy and have begun to provide evidence from many lines to  
563 understand how evolutionary processes underlying species richness gradients works (Hutter et al.  
564 2017, Pinto-Ledezma et al. 2017).

565

566 ***Conclusions and recommendations***

567           The resulting geographical pattern of several phylogenetic metrics did not provide any  
568 robust evidence of a spatially explicit diversification dynamic. As we have shown, these resulting  
569 geographical patterns did not differ from that generated by a simple null model. It is hard to  
570 untangle causal mechanisms (i.e., speciation, extinction, and dispersal) from only the  
571 geographical signature that these metrics attempt to capture. We recommend that phylogenetic  
572 metrics should be used only to visualize geographical patterns of total diversification (e.g., MRD,  
573 residual PD; MDR), phylogenetic structure (e.g., PSV), or mean ages of co-distributed species  
574 (e.g., MA) (Table 1). We suggest that conclusions about the role of evolutionary processes in the  
575 generation and maintenance of species richness gradients based only in these phylogenetic  
576 metrics should be avoided and additional approaches always should be used.

577           Some explicit diversification approaches (e.g., model fitting approaches; (Etienne et al.  
578 2012, Rabosky 2014, Valente et al. 2015) are useful to establish the macroevolutionary dynamics  
579 operating at regional scales. Although some approaches (e.g, the GeoSSE model) allow us to  
580 evaluate the relative role of the ultimate process that modify the regional species diversity, its  
581 statistical power (e.g., high Type I errors) has been challenged by simulation and empirical  
582 studies. Furthermore, the extinction and dispersal estimates inferred by the GeoSSE model tend  
583 to be unbiased. Parametric biogeographic approaches are becoming a standard tool to evaluate  
584 how evolutionary processes can explain the geographical distribution of extant taxa. These  
585 approaches are promising and should be extensively used because allow us to estimate the  
586 relative frequency of cladogenetic and anagenetic process shaping the regional species richness.

587           It is necessary that macroecological studies use a combination of explicit diversification  
588 approaches and parameter biogeographic methods with the aim to clarify how evolutionary

589 process have shaped regional species richness assemblages. As Jablonski et al. (2017) have  
590 outlined, one of the main obstacles to generate an appropriate understanding of the causal  
591 mechanisms underlying geographical diversity gradients has been that many studies have tested  
592 a single hypothesis, either evolutionary or ecological, as an explanatory factor. We suggest that  
593 ecological and evolutionary hypotheses should be tested simultaneously to explain the relative  
594 contribution of each process to the regional diversity. As shown by our empirical comparison of  
595 phylogenetic metrics, explicit diversification models, and historical biogeographic methods have  
596 showed, it is necessary to obtain evidence of different approaches to guarantee sound  
597 conclusions about the evolutionary causes of these biodiversity gradients.

598

#### 599 **Acknowledgments**

600 We thank Josep Padullés for reviewing the English. JAV is supported by a Postdoctoral fellowship  
601 from DGAPA program at Facultad de Ciencias of the UNAM. JAV thanks to Oscar Flores Villela for  
602 providing a working space at Museo of Zoologia "Alfonso L. Herrera" and insightful discussions  
603 about historical biogeography and evolutionary biology. JNPL is supported by a Postdoctoral  
604 research fellowship from the Grand Challenge in Biology Postdoctoral Program, College of  
605 Biological Sciences, University of Minnesota.

606

#### 607 **Literature cited**

608 Alfaro, M. E. et al. 2009. Nine exceptional radiations plus high turnover explain species diversity in  
609 jawed vertebrates. - Proc. Natl. Acad. Sci. U. S. A. 106: 13410–4.

610 Algar, A. C. and Losos, J. B. 2011. Evolutionary assembly of island faunas reverses the classic

- 611 island – mainland richness difference in *Anolis* lizards.: 1125–1137.
- 612 Algar, A. C. et al. 2009. Evolutionary constraints on regional faunas: whom, but not how many. -  
613 *Ecol. Lett.*: 57–65.
- 614 Alves, D. M. C. C. et al. 2017. Geographical diversification and the effect of model and data  
615 inadequacies: The bat diversity gradient as a case study. - *Biol. J. Linn. Soc.* 121: 894–906.
- 616 Antonelli, A. and Sanmartín, I. 2011. Mass extinction, gradual cooling, or rapid radiation?  
617 Reconstructing the spatiotemporal evolution of the ancient angiosperm genus *Hedyosmum*  
618 (*Chloranthaceae*) using empirical and simulated approaches. - *Syst. Biol.* 60: 596–615.
- 619 Antonelli, A. et al. 2015. An engine for global plant diversity: highest evolutionary turnover and  
620 emigration in the American tropics. - *Front. Genet.* 6: 1–14.
- 621 Barton, N. H. and Charlesworth, B. 1984. Genetic Revolutions, Founder Effects, and Speciation. -  
622 *Annu. Rev. Ecol. Syst.* 15: 133–164.
- 623 Baum, D. A. et al. 2005. The tree-thinking challenge. - *Science* (80-. ). 310: 979–980.
- 624 Brown, J. 1995. *Macroecology*. - University of Chicago Press.
- 625 Brown, J. H. 2014. Why are there so many species in the tropics? - *J. Biogeogr.* 41: 8–22.
- 626 Brown, J. H. and Lomolino, M. V. 1998. *Biogeography*. - Sinauer Associates, Inc.
- 627 Buckley, L. B. et al. 2010. Phylogeny, niche conservatism and the latitudinal diversity gradient in  
628 mammals. - *Proc. Biol. Sci.* 277: 2131–8.
- 629 Cabral, J. S. et al. 2017. Mechanistic simulation models in macroecology and biogeography: state-  
630 of-art and prospects. - *Ecography (Cop.)*. 40: 1–14.

- 631 Castroviejo-Fisher, S. et al. 2014. Neotropical diversification seen through glassfrogs (M Ebach,  
632 Ed.). - *J. Biogeogr.* 41: 66–80.
- 633 Cavender-Bares, J. et al. 2004. Phylogenetic Overdispersion in Floridian Oak Communities. - *Am.*  
634 *Nat.* 163: 823–843.
- 635 Cavender-Bares, J. et al. 2006. Phylogenetic structure of floridian plant communities depends on  
636 taxonomic and spatial scale. - *Ecology* 87: 109–122.
- 637 Chazot, N. et al. 2016. Into the Andes: multiple independent colonizations drive montane  
638 diversity in the Neotropical clearwing butterflies Godyrina. - *Mol. Ecol.* 25: 5765–5784.
- 639 Chown, S. L. and Gaston, K. J. 2000. Areas cradles and museums: The latitudinal gradient in  
640 species richness. - *Trends Ecol. Evol.* 15: 311–315.
- 641 Condamine, F. L. et al. 2013. Macroevolutionary perspectives to environmental change. - *Ecol.*  
642 *Lett.* 16 Suppl 1: 72–85.
- 643 Cornell, H. V 2013. Is regional species diversity bounded or unbounded? - *Biol. Rev. Camb. Philos.*  
644 *Soc.* 88: 140–65.
- 645 Crisp, M. D. and Cook, L. G. 2005. Do early branching lineages signify ancestral traits? - *Trends*  
646 *Ecol. Evol.* 20: 122–128.
- 647 Davies, T. J. and Buckley, L. B. 2011. Phylogenetic diversity as a window into the evolutionary and  
648 biogeographic histories of present-day richness gradients for mammals. - *Philos. Trans. R.*  
649 *Soc. Lond. B. Biol. Sci.* 366: 2414–25.
- 650 Diniz-Filho, J. A. F. et al. 2013. Evolutionary macroecology. - *Front. Biogeogr.* 5: 1–11.

- 651 Dupin, J. et al. 2017. Bayesian estimation of the global biogeographical history of the Solanaceae.  
652 - *J. Biogeogr.* 44: 887–899.
- 653 Eiserhardt, W. L. et al. 2013. Dispersal and niche evolution jointly shape the geographic turnover  
654 of phylogenetic clades across continents. - *Sci. Rep.* 3: 1164.
- 655 Etienne, R. S. and Haegeman, B. 2012. A Conceptual and Statistical Framework for Adaptive  
656 Radiations with a Key Role for Diversity Dependence. - *Am. Nat.* 180: E75–E89.
- 657 Etienne, R. S. et al. 2012. Diversity-dependence brings molecular phylogenies closer to  
658 agreement with the fossil record. - *Proc. Biol. Sci.* 279: 1300–9.
- 659 Faith, D. P. 1992. Conservation evaluation and phylogenetic diversity. - *Biol. Conserv.* 61: 1–10.
- 660 Feldman, A. et al. 2016. Body sizes and diversification rates of lizards, snakes, amphisbaenians  
661 and the tuatara. - *Glob. Ecol. Biogeogr.* 25: 187–197.
- 662 Fine, P. V. A. 2015. Ecological and Evolutionary Drivers of Geographic Variation in Species  
663 Diversity. - *Annu. Rev. Ecol. Evol. Syst.* 46: 369–392.
- 664 Foote, M. 2000. Origination and extinction components of taxonomic diversity: general problems.  
665 - *Paleobiology* 26: 74–102.
- 666 Forest, F. et al. 2007. Preserving the evolutionary potential of floras in biodiversity hotspots. -  
667 *Nature* 445: 757–760.
- 668 Fritz, S. a. and Rahbek, C. 2012. Global patterns of amphibian phylogenetic diversity. - *J.*  
669 *Biogeogr.* 39: 1373–1382.
- 670 Fritz, S. a et al. 2013. Diversity in time and space: wanted dead and alive. - *Trends Ecol. Evol.* 28:

- 671           509–16.
- 672   Goldberg, E. E. et al. 2005. Diversity, Endemism, and Age Distributions in Macroevolutionary  
673           Sources and Sinks. - *Am. Nat.* 165: 623–633.
- 674   Goldberg, E. E. et al. 2011. Phylogenetic inference of reciprocal effects between geographic range  
675           evolution and diversification. - *Syst. Biol.* 60: 451–65.
- 676   Gotelli, N. J. 2000. Null Model Analysis of Species Co-Occurrence Patterns. - *Ecology* 81: 2606.
- 677   Graham, C. H. et al. 2018. Phylogenetic scale in ecology and evolution. - *Glob. Ecol. Biogeogr.* 27:  
678           175–187.
- 679   Harmon, L. J. and Harrison, S. 2015. Species Diversity Is Dynamic and Unbounded at Local and  
680           Continental Scales. - *Am. Nat.* 185: 584–593.
- 681   Hawkins, B. a et al. 2007. Climate, niche conservatism, and the global bird diversity gradient. -  
682           *Am. Nat.* 170 Suppl: S16-27.
- 683   Hawkins, B. a. et al. 2012. Different evolutionary histories underlie congruent species richness  
684           gradients of birds and mammals. - *J. Biogeogr.* 39: 825–841.
- 685   Hawkins, B. A. et al. 2017. Structural bias in aggregated species-level variables driven by repeated  
686           species co-occurrences: a pervasive problem in community and assemblage data. - *J.*  
687           *Biogeogr.* 44: 1199–1211.
- 688   Helmus, M. R. et al. 2007. Phylogenetic measures of biodiversity. - *Am. Nat.* 169: E68-83.
- 689   Hutter, C. R. et al. 2017. Rapid Diversification and Time Explain Amphibian Richness at Different  
690           Scales in the Tropical Andes, Earth’s Most Biodiverse Hotspot. - *Am. Nat.* 190: 000–000.



- 691 Jablonski, D. et al. 2006. Out of the tropics: Evolutionary dynamics of the latitudinal diversity  
692 gradient. - *Science* (80-. ). 314: 102–106.
- 693 Jablonski, D. et al. 2017. Shaping the Latitudinal Diversity Gradient: New Perspectives from a  
694 Synthesis of Paleobiology and Biogeography. - *Am. Nat.* 189: 1–12.
- 695 Jetz, W. et al. 2012. The global diversity of birds in space and time. - *Nature* 491: 444–448.
- 696 Jezkova, T. and Wiens, J. J. 2017. What Explains Patterns of Diversification and Richness among  
697 Animal Phyla? - *Am. Nat.* 189: 000–000.
- 698 Kennedy, J. D. et al. 2014. Into and out of the tropics: The generation of the latitudinal gradient  
699 among New World passerine birds. - *J. Biogeogr.* 41: 1746–1757.
- 700 Kerr, J. T. and Currie, D. J. 1999. The relative importance of evolutionary and environmental  
701 controls on broad-scale patterns of species richness in North America. - *Ecoscience* 6: 329–  
702 337.
- 703 Landis, M. J. et al. 2013. Bayesian analysis of biogeography when the number of areas is large. -  
704 *Syst. Biol.* 62: 789–804.
- 705 Latham, R. E. and Ricklefs, R. E. 1993. Global Patterns of Tree Species Richness in Moist Forests:  
706 Energy-Diversity Theory Does Not Account for Variation in Species Richness. - *Oikos* 67:  
707 325–333.
- 708 Leidinger, L. and Cabral, J. S. 2017. Biodiversity dynamics on Islands: Explicitly accounting for  
709 causality in mechanistic models. - *Diversity* 9: 30.
- 710 Lewitus, E. and Morlon, H. 2017. Detecting environment-dependent diversification from  
711 phylogenies: a simulation study and some empirical illustrations. - *Syst. Biol.* in press.

- 712 Looney, B. P. et al. 2016. Into and out of the tropics: Global diversification patterns in a  
713 hyperdiverse clade of ectomycorrhizal fungi. - *Mol. Ecol.* 25: 630–647.
- 714 Losos, J. B. and Schluter, D. 2000. Analysis of an evolutionary species-area relationship. - *Nature*  
715 408: 847–50.
- 716 Magallón, S. and Sanderson, M. J. 2001. Absolute diversification rates in angiosperm clades. -  
717 *Evolution* 55: 1762–80.
- 718 Marshall, C. R. 2017. Five palaeobiological laws needed to understand the evolution of the living  
719 biota. - *Nat. Ecol. Evol.* 1: 165.
- 720 Marshall, C. R. and Quental, T. B. 2016. The uncertain role of diversity dependence in species  
721 diversification and the need to incorporate time-varying carrying capacities. - *Philos. Trans.*  
722 *R. Soc. B Biol. Sci.* 371: 20150217.
- 723 Matzke, N. J. 2014. Model selection in historical biogeography reveals that founder-event  
724 speciation is a crucial process in island clades. - *Syst. Biol.* 63: 951–970.
- 725 McGaughran, A. 2015. Integrating a Population Genomics Focus into Biogeographic and  
726 Macroecological Research. - *Front. Ecol. Evol.* 3: 1–5.
- 727 McPeck, M. A. and Holt, R. D. 1992. The Evolution of Dispersal in Spatially and Temporally  
728 Varying Environments. - *Am. Nat.* 140: 1010–1027.
- 729 Miller, E. T. et al. 2017. Phylogenetic community structure metrics and null models: a review with  
730 new methods and software. - *Ecography (Cop.)*. 40: 461–477.
- 731 Moen, D. S. and Wiens, J. J. 2017. Microhabitat and Climatic Niche Change Explain Patterns of  
732 Diversification among Frog Families. - *Am. Nat.* 190: 29–44.

- 733 Morinière, J. et al. 2016. Phylogenetic niche conservatism explains an inverse latitudinal diversity  
734 gradient in freshwater arthropods. - *Sci. Rep.* 6: 1–12.
- 735 Morlon, H. 2014. Phylogenetic approaches for studying diversification. - *Ecol. Lett.* 17: 508–25.
- 736 Morlon, H. et al. 2010. Inferring the dynamics of diversification: a coalescent approach. - *PLoS*  
737 *Biol.* in press.
- 738 Nee, S. 2006. Birth-Death Models in Macroevolution. - *Annu. Rev. Ecol. Evol. Syst.* 37: 1–17.
- 739 Nee, S. et al. 1994. The reconstructed evolutionary process. - *Philos. Trans. R. Soc. Lond. B. Biol.*  
740 *Sci.* 344: 305–11.
- 741 Omland, K. E. et al. 2008. Tree thinking for all biology: the problem with reading phylogenies as  
742 ladders of progress. - *BioEssays* 30: 854–67.
- 743 Paper, S. et al. 2006. Likelihood Methods for Detecting Temporal Shifts in Diversification Rates. -  
744 *Evolution (N. Y.)* 60: 1152.
- 745 Paper, S. et al. 2016. Past, future, and present of state-dependent models of diversification. - *Am.*  
746 *J. Bot.* 103: 792–795.
- 747 Paper, S. et al. 2017. Accelerated body size evolution during cold climatic periods in the Cenozoic.  
748 - *Proc. Natl. Acad. Sci.* 114: 4183–4188.
- 749 Pärtel, M. et al. 2016. Macroecology of biodiversity: disentangling local and regional effects. -  
750 *New Phytol.* 211: 404–410.
- 751 Pérez-Escobar, O. A. et al. 2017. Recent origin and rapid speciation of Neotropical orchids in the  
752 world's richest plant biodiversity hotspot. - *New Phytol.* 215: 891–905.

- 753 Pinto-Ledezma, J. N. et al. 2017. The geographical diversification of Furnariides: the role of forest  
754 versus open habitats in driving species richness gradients. - *J. Biogeogr.* 44: 1683–1693.
- 755 Poe, S. et al. Comparative evolution of an archetypal adaptive radiation: Innovation and  
756 opportunity in *Anolis* lizards. - *Am. Nat.* in press.
- 757 Poe, S. et al. 2017. A Phylogenetic, Biogeographic, and Taxonomic study of all Extant Species of  
758 *Anolis* (Squamata; Iguanidae). - *Syst. Biol.* 0: 1–35.
- 759 Pulido-Santacruz, P. and Weir, J. T. 2016. Extinction as a driver of avian latitudinal diversity  
760 gradients. - *Evolution* (N. Y). 70: 860–872.
- 761 Pyron, R. A. 2014a. Biogeographic analysis reveals ancient continental vicariance and recent  
762 oceanic dispersal in amphibians. - *Syst. Biol.* 63: 779–797.
- 763 Pyron, R. A. 2014b. Biogeographic Analysis Reveals Ancient Continental Vicariance and Recent  
764 Oceanic Dispersal in Amphibians. - *Syst. Biol.* 63: 779–797.
- 765 Pyron, R. A. 2014c. Temperate extinction in squamate reptiles and the roots of latitudinal  
766 diversity gradients. - *Glob. Ecol. Biogeogr.* 23: 1126–1134.
- 767 Qian, H. et al. 2014. Evolutionary and ecological causes of species richness patterns in North  
768 American angiosperm trees. - *Ecography* (Cop.): 1–10.
- 769 Qian, H. et al. 2015. Evolutionary and ecological causes of species richness patterns in North  
770 American angiosperm trees. - *Ecography* (Cop.). 38: 241–250.
- 771 Quental, T. B. and Marshall, C. R. 2010. Diversity dynamics: molecular phylogenies need the fossil  
772 record. - *Trends Ecol. Evol.* 25: 434–41.

- 773 Rabosky, D. 2009. Ecological limits and diversification rate: alternative paradigms to explain the  
774 variation in species richness among clades and regions. - *Ecol. Lett.* 12: 735–743.
- 775 Rabosky, D. L. 2010a. Extinction rates should not be estimated from molecular phylogenies. -  
776 *Evolution* 64: 1816–24.
- 777 Rabosky, D. L. 2010b. Primary controls on species richness in higher taxa. - *Syst. Biol.* 59: 634–45.
- 778 Rabosky, D. L. 2012. Testing the time-for-speciation effect in the assembly of regional biotas. -  
779 *Methods Ecol. Evol.* 3: 224–233.
- 780 Rabosky, D. L. 2013. Diversity-Dependence, Ecological Speciation, and the Role of Competition in  
781 Macroevolution. - *Annu. Rev. Ecol. Evol. Syst.* 44: 481–502.
- 782 Rabosky, D. L. 2014. Automatic detection of key innovations, rate shifts, and diversity-  
783 dependence on phylogenetic trees. - *PLoS One* in press.
- 784 Rabosky, D. L. 2016a. Reproductive isolation and the causes of speciation rate variation in nature.  
785 - *Biol. J. Linn. Soc.* 118: 13–25.
- 786 Rabosky, D. L. 2016b. Challenges in the estimation of extinction from molecular phylogenies: A  
787 response to Beaulieu and O'Meara. - *Evolution (N. Y.)* 70: 218–228.
- 788 Rabosky, D. L. and Lovette, I. J. 2008. Density-dependent diversification in North American wood  
789 warblers. - *Proc. Biol. Sci.* 275: 2363–71.
- 790 Rabosky, D. L. and Hurlbert, A. H. 2015. Species Richness at Continental Scales Is Dominated by  
791 Ecological Limits. - *Am. Nat.* 185: 572–583.
- 792 Rabosky, D. L. and Goldberg, E. E. 2015. Model Inadequacy and Mistaken Inferences of Trait-

- 793           Dependent Speciation. - *Syst. Biol.* 64: 340–355.
- 794   Rabosky, D. L. and Goldberg, E. E. 2017. FiSSE: A simple nonparametric test for the effects of a  
795           binary character on lineage diversification rates. - *Evolution* (N. Y). 71: 1432–1442.
- 796   Rabosky, D. L. et al. 2014. BAMMtools: An R package for the analysis of evolutionary dynamics on  
797           phylogenetic trees (S Kembel, Ed.). - *Methods Ecol. Evol.* 5: 701–707.
- 798   Rabosky, D. L. et al. 2015. Minimal effects of latitude on present-day speciation rates in New  
799           World birds. - *Proc. R. Soc. B Biol. Sci.* 282: 20142889.
- 800   Ramiadantsoa, T. et al. 2017. Phylogenetic Comparative Method for Geographical Radiation. -  
801           *Ann. Zool. Fennici* 54: 237–257.
- 802   Ree, R. H. et al. 2005. A likelihood framework for inferring the evolution of geographic range on  
803           phylogenetic trees. - *Evolution* (N. Y). 59: 2299–311.
- 804   Robledo-Arnuncio, J. J. et al. 2014. Space, time and complexity in plant dispersal ecology. - *Mov.*  
805           *Ecol.* 2: 1–17.
- 806   Rolland, J. et al. 2014. Faster speciation and reduced extinction in the tropics contribute to the  
807           mammalian latitudinal diversity gradient. - *PLoS Biol.* 12: e1001775.
- 808   Ronquist, F. 1997. Dispersal-vicariance analysis: a new approach to the quantification of historical  
809           biogeography. - *Syst. Bot.* 46: 195–203.
- 810   Roy, K. and Goldberg, E. E. 2007. Origination, Extinction, and Dispersal: Integrative Models for  
811           Understanding Present-Day Diversity Gradients. - *Am. Nat.* 170: S71–S85.
- 812   Sánchez-Ramírez, S. et al. 2015. In and out of refugia: Historical patterns of diversity and

- 813 demography in the North American Caesar's mushroom species complex. - *Mol. Ecol.* 24:  
814 5938–5956.
- 815 Sánchez-Reyes, L. L. et al. 2017. Uncovering higher-taxon diversification dynamics from clade age  
816 and species-richness data. - *Syst. Biol.* 66: 367–378.
- 817 Sanmartín, I. et al. 2010. Bayesian island biogeography in a continental setting: the Rand Flora  
818 case. - *Biol. Lett.* 6: 703–707.
- 819 Sanmartín, I. 2012. Historical Biogeography: Evolution in Time and Space. - *Evol. Educ. Outreach*  
820 5: 555–568.
- 821 Sanmartín, I. and Meseguer, A. S. 2016. Extinction in phylogenetics and biogeography: From  
822 timetrees to patterns of biotic assemblage. - *Front. Genet.* 7: 1–17.
- 823 Sanmartín, I. et al. 2008. Inferring dispersal: a Bayesian approach to phylogeny-based island  
824 biogeography, with special reference to the Canary Islands. - *J. Biogeogr.* 35: 428–449.
- 825 Schluter, D. and Pennell, M. W. 2017. Speciation gradients and the distribution of biodiversity. -  
826 *Nature* 546: 48–55.
- 827 Sepkoski, J. J. 1998. Rates of speciation in the fossil record. - *Philos. Trans. R. Soc. Lond. B. Biol.*  
828 *Sci.* 353: 315–26.
- 829 Silvestro, D. et al. 2014. Bayesian estimation of speciation and extinction from incomplete fossil  
830 occurrence data. - *Syst. Biol.* 63: 349–367.
- 831 Silvestro, D. et al. 2016. Fossil biogeography: a new model to infer dispersal, extinction and  
832 sampling from palaeontological data. - *Philos. Trans. R. Soc. B Biol. Sci.* 371: 20150225.

- 833 Stadler, T. 2013. Recovering speciation and extinction dynamics based on phylogenies. 26: 1203–  
834 1219.
- 835 Staggemeier, V. G. et al. 2015. Phylogenetic analysis in *Myrcia* section *Aulomyrcia* and inferences  
836 on plant diversity in the Atlantic rainforest. - *Ann. Bot.* 115: 747–761.
- 837 Stephens, P. R. and Wiens, J. J. 2003. Explaining species richness from continents to communities:  
838 the time-for-speciation effect in emydid turtles. - *Am. Nat.* 161: 112–28.
- 839 Templeton, A. R. 2008. The reality and importance of founder speciation in evolution. - *BioEssays*  
840 30: 470–479.
- 841 Valente, L. M. et al. 2015. Equilibrium and non-equilibrium dynamics simultaneously operate in  
842 the Galápagos islands. - *Ecol. Lett.* 18: 844–852.
- 843 Velasco, J. A. 2018. Are Historical Biogeographical Events Able to Promote Biological  
844 Diversification? - In: Levente, H. (ed), *Pure and Applied Biogeography*. InTechOpen, pp. 15–  
845 30.
- 846 Velasco, J. A. et al. 2018. Climatic and evolutionary factors shaping geographical gradients of  
847 species richness in *Anolis* lizards. - *Biol. J. Linn. Soc.* xx: 1–13.
- 848 Vellend, M. et al. 2010. Measuring phylogenetic biodiversity. - *Front. Meas. Biol. Divers.*: 194–207.
- 849 Wellborn, G. A. and Langerhans, R. B. 2015. Ecological opportunity and the adaptive  
850 diversification of lineages. - *Ecol. Evol.* 5: 176–195.
- 851 Wiens, J. J. 2011. The Causes Of Species Richness Patterns Across Space, Time, And Clades And  
852 The Role Of “Ecological Limits.” - *Q. Rev. Biol.* 86: 75–96.



- 853 Wiens, J. J. and Donoghue, M. J. 2004. Historical biogeography, ecology and species richness. -  
854 Trends Ecol. Evol. 19: 639–44.
- 855 Wiens, J. J. and Graham, C. H. 2005. Niche conservatism: Integrating evolution, ecology, and  
856 conservation biology. - Annu. Rev. Ecol. Evol. Syst. 36: 519–539.
- 857 Wiens, J. J. et al. 2006. Evolutionary and Ecological Causes of the Latitudinal Diversity Gradient in  
858 Hylid Frogs: Treefrog Trees Unearth the Roots of High Tropical Diversity. - Am. Nat. 168:  
859 579–596.
- 860

861 Table 1: Phylogenetic metrics and explicit diversification approaches used in macroecological  
 862 studies to address evolutionary questions related with the geographical diversity gradients.

| <b>Metric</b> | <b>Author</b>                         | <b>Description</b>                                                                                                                                                                                                                                                                                                                                                                                                                                                        | <b>Software / R package</b> |
|---------------|---------------------------------------|---------------------------------------------------------------------------------------------------------------------------------------------------------------------------------------------------------------------------------------------------------------------------------------------------------------------------------------------------------------------------------------------------------------------------------------------------------------------------|-----------------------------|
| MRD           | Kerr and Currie 1999                  | MRD is calculated by counting the number of nodes separating each terminal species in a regional assemblage or cell from the tips to root of the phylogenetic tree. This metric does not need that trees be ultrametric or have branch lengths.                                                                                                                                                                                                                           | metricTester                |
| PD (residual) | Faith 1992                            | PD is calculated by summing all the branch lengths of species co-occurring in a regional assemblage or cell. Residual PD is obtained from an ordinary least square regression between PD and species richness.                                                                                                                                                                                                                                                            | picante, metricTester, pez  |
| PSV           | Helmus et al. 2007, Algar et al. 2009 | PSV is calculated from a matrix where their diagonal elements provide the evolutionary divergence (based on the branch lengths) of each terminal species from the root to the tips of the tree, and the off-diagonal elements provide the degree of shared evolutionary history among species. Values close to zero indicates that all species in a regional assemblage or cell are very close related whereas values close to one indicate that species are not related. | picante, metricTester, pez  |
| mean DR       | Jetz et al. 2012                      | DR is calculated as the inverse of a measure of evolutionary isolation (Redding & Mooers 2006) which sum all the edge lengths from a species to the root of the tree. The inverse of this evolutionary isolation metric therefore capture the level of splitting rate of each species (i.e., its path to a top).                                                                                                                                                          | FISSE                       |
| Mean age      | Latham and Ricklefs 1993              | The mean age of co-occurring species in a regional assemblage or cell simply is calculated tallying the age of each most recent common ancestor (MRCA) for each species and the averaged.                                                                                                                                                                                                                                                                                 | None                        |

---

|        |                      |                                                                                                                                                                                                                                                                                                                                                           |                                       |
|--------|----------------------|-----------------------------------------------------------------------------------------------------------------------------------------------------------------------------------------------------------------------------------------------------------------------------------------------------------------------------------------------------------|---------------------------------------|
| GeoSSE | Goldberg et al. 2011 | The geographic state speciation and extinction -GeoSSE- model is a trait-dependent diversification method linking geographic occurrence with diversification rates. These method allow to infer both speciation and extinction rates as movement (dispersal) rates among two regions.                                                                     | Diversitree R package                 |
| BAMM   | Rabosky 2014         | BAMM is a method that attempt to identify whether a phylogeny exhibit a single or various macroevolutionary regimes (i.e., different diversification dynamics). As speciation, extinction and net diversification rates are considered to be heterogeneous across the phylogeny it is possible to estimate a rate for each branch or species in the tree. | BAMM software and BAMMtools R package |

---

| Hypothesis                            | References            | Description                                                                                                                                                       | Predictions                                                                                                                                                                                                                                                                                                                                              | Metrics and/or methods used to test | Limitations                                                                                                                                                                                                                                                                                                                                                                                                                                                                                                                                                                                                                                                                                                                                                                                                                                                                                                                                                  |
|---------------------------------------|-----------------------|-------------------------------------------------------------------------------------------------------------------------------------------------------------------|----------------------------------------------------------------------------------------------------------------------------------------------------------------------------------------------------------------------------------------------------------------------------------------------------------------------------------------------------------|-------------------------------------|--------------------------------------------------------------------------------------------------------------------------------------------------------------------------------------------------------------------------------------------------------------------------------------------------------------------------------------------------------------------------------------------------------------------------------------------------------------------------------------------------------------------------------------------------------------------------------------------------------------------------------------------------------------------------------------------------------------------------------------------------------------------------------------------------------------------------------------------------------------------------------------------------------------------------------------------------------------|
| Phylogenetic niche conservatism (PNC) | Wiens and Graham 2005 | Phylogenetic niche conservatism is the tendency of related species to inherit niche requirements from its the most recent common ancestors (Wiens & Graham 2005). | PNC predicts that regions where a clade originated will accumulate more species simply due to more occupation time and diversification rates tend to be similar between regions. The tropical niche conservatism hypothesis (TNC; Wiens and Donoghue 2004) is based on PNC to explain differences in species richness in tropical and temperate regions. | MRD, Mean age, GeoSSE, BAMM         | 1) MRD metric fails to capture spatially dynamics of the balance of speciation and extinction and it is very hard to establish whether species richness in a region is only generated by higher speciation rates. Furthermore, MRD does not capture dispersal dynamic across regions and species richness in a given region can be generated from only dispersals from nearby regions (e.g., macroevolutionary sinks; CITA). 2) Mean age provide partial is able to test the role of PNC on geographical species richness because only it is possible to establish which regions have, in average, old clades and this not reflects whether many speciation events occurred there. 3) GeoSSE is potentially the only one approach that allow to disentangle these three process but it is only limited to two regions (e.g., tropical vs. temperate). In addition, GeoSSE has been criticized due its low statistical power (see Rabosky and Goldberg 2015). |

|                                  |                         |                                                                                                                                        |                                                                                                                                                                                                                 |                           |                                                                                                                                                                                                                                                                                                                                                                                                                                                                                                                                                                |
|----------------------------------|-------------------------|----------------------------------------------------------------------------------------------------------------------------------------|-----------------------------------------------------------------------------------------------------------------------------------------------------------------------------------------------------------------|---------------------------|----------------------------------------------------------------------------------------------------------------------------------------------------------------------------------------------------------------------------------------------------------------------------------------------------------------------------------------------------------------------------------------------------------------------------------------------------------------------------------------------------------------------------------------------------------------|
| Regional diversification (RD)    | Buckley et al. 2010     | Differences in the balance of speciation and extinction across geography can explain differences in species richness between regions.  | RD predicts that regions with striking differences in species richness are due to differences in macroevolutionary dynamics between regions.                                                                    | residual PD, GeoSSE, BAMM | 1) Residual PD can be used to discriminate regions with rapid and slow diversification based on the expected phylogenetic diversity given species richness (Buckley et al. 2010). However, this metric ignores the contribution to dispersal to PD in a given region or cell. 2) GeoSSE can estimate speciation, extinction and dispersal rates between regions but again is limited to two regions. 3) BAMM potentially could be used to estimate speciation rates for regional clades but this method is unable to estimate dispersal rates between regions. |
| Out of the tropics (OTT)         | Jablonski et al. 2006   | Species were generated in the tropical regions and dispersed to extratropical regions but maintain its presence in its ancestral areas | High rates of speciation are predicted in tropical regions in contrast with temperate regions. Asymmetric dispersal have occurred along the biogeographical history of a taxa from tropical to temperate areas. | MRD, Mean age, GeoSSE     | These metrics are the same used to test the PNC/TNC hypothesis as we discuss above.                                                                                                                                                                                                                                                                                                                                                                                                                                                                            |
| Time for speciation effect (TEE) | Stephens and Wiens 2003 | Tropical regions accumulated more species because their clades had more time to speciate than temperate regions.                       | Regions recently colonized had lower species richness than regions where clades colonized very early in the history of a clade.                                                                                 | Mean age                  | 1) Mean age does not provide an accurate description of which lineages colonized first a region. To test this hypothesis, it might be necessary to perform an ancestral range reconstruction of all co-occurring clades and estimate its diversification rates (i.e., total diversification for each independent colonized clade; Rabosky 2009; 2012).                                                                                                                                                                                                         |

864 Table 3. Parameter estimates from the GeoSSE model for three taxonomic groups (Furnariides birds,  
 865 hylid frogs, and *Anolis* lizards) across two regions. Areas for each taxonomic group as follows:  
 866 Furnariides birds: A: Forest; B: Open areas; Hylid frogs: A: Extra tropics; B: Tropics; *Anolis* lizards: A:  
 867 Islands; B: Mainland.

| Group                 | Rates               | A             | B              | AB            |
|-----------------------|---------------------|---------------|----------------|---------------|
| Furnariides birds     | Speciation          | 0.139 ± 0.020 | 0.223 ± 0.065  | 0.041 ± 0.020 |
|                       | Extinction          | 0.040 ± 0.025 | 0.107 ± 0.075  | -             |
|                       | Dispersal           | 0.021 ± 0.004 | 0.311 ± 0.114  | -             |
|                       | Net diversification | 0.099 ± 0.005 | 0.116 ± 0.01   | -             |
| Hylid frogs           | Speciation          | 0.044 ± 0.003 | 0.044 ± 0.003  | 0.041 ± 0.025 |
|                       | Extinction          | 0.002 ± 0.002 | 0.002 ± 0.002  | -             |
|                       | Dispersal           | 0.001 ± 0.001 | 0.035 ± 0.010  | -             |
|                       | Net diversification | 0.042 ± 0.003 | 0.042 ± 0.003  | -             |
| <i>Anolis</i> lizards | Speciation          | 0.058 ± 0.003 | 0.058 ± 0.003  | 1.245 ± 1.303 |
|                       | Extinction          | 0.001 ± 0.001 | 0.001 ± 0.001  | -             |
|                       | Dispersal           | 0.002 ± 0.001 | 0.0003 ± 0.000 | -             |
|                       | Net diversification | 0.057 ± 0.002 | 0.057 ± 0.002  | -             |

868

869 Table 4. Frequency of dispersal events inferred using biogeographical stochastic mapping (BSM) for  
 870 three taxonomic groups (Furnariides birds, hylid frogs, and *Anolis* lizards) across two regions. Areas for  
 871 each taxonomic group as follows: Furnariides birds: A: Forest; B: Open areas; Hylid frogs: A: Extra  
 872 tropics; B: Tropics; *Anolis* lizards: A: Islands; B: Mainland.

873

| <b>Event</b>     | <b>Group</b>          | <b>Regions</b> | <b>A</b>     | <b>B</b>     |
|------------------|-----------------------|----------------|--------------|--------------|
| Range expansions | Furnariides birds     | <b>A</b>       | 0            | 92.62 ± 4.39 |
|                  |                       | <b>B</b>       | 31.4 ± 4.29  | 0            |
|                  | Hylid frogs           | <b>A</b>       | 0            | 0.64 ± 0.78  |
|                  |                       | <b>B</b>       | 12.92 ± 0.88 | 0            |
|                  | <i>Anolis</i> lizards | <b>A</b>       | 0            | 0            |
|                  |                       | <b>B</b>       | 0            | 0            |
| Founder events   | Furnariides birds     | <b>A</b>       | 0            | 24.46 ± 2.54 |
|                  |                       | <b>B</b>       | 10.88 ± 2.22 | 0            |
|                  | Hylid frogs           | <b>A</b>       | 0            | 0.66 ± 0.66  |
|                  |                       | <b>B</b>       | 4.3 ± 1.42   | 0            |
|                  | <i>Anolis</i> lizards | <b>A</b>       | 0            | 2.02 ± 0.14  |
|                  |                       | <b>B</b>       | 0.12 ± 0.33  | 0            |

874

875

876 FIGURE LEGENDS

877 Figure 1. Diagram illustrating how differences in speciation, extinction, and dispersal rates between  
878 regions can generate a geographical species richness gradient. The phylogenetic trees below illustrate  
879 how the differences in speciation and extinction rates between two regional assemblages can shape a  
880 gradient of species richness (degraded blue colour).

881

882 Figure 2. Geographical patterns of some phylogenetic metrics used in macroecological studies to  
883 explore evolutionary process underlying geographical diversity gradients (see also Table 1 for a detailed  
884 explanation). Left column *Anolis* lizards; Middle column: Hylid frogs; Right column: Furnariides birds.  
885 (A-C) observed richness patterns; (D-F) rPD: residual phylogenetic diversity (i.e., after controlling for  
886 species richness); (G-I) PSV: phylogenetic species variability; (J-L) MRD: mean root distance; (M-O)  
887 MDR: mean diversification rate; (P-R) Mean ages: average ages of species.

888

889 Figure 3. P-values distribution for each phylogenetic metric obtained through the null model (see main  
890 text for details). The vertical red lines represent the empirical 0.05 cut-off. Note that for all cases very  
891 few cells are below the 0.05 cut-off. (A-C) rPD: residual phylogenetic diversity (i.e., after controlling for  
892 species richness); (D-F) PSV: phylogenetic species variability; (G-I) MRD: mean root distance; (J-L)  
893 MDR: mean diversification rate; (M-O) Mean ages: average ages of species.

894

895 Figure 4. Variation of phylogenetic metric values for Furnariides birds in forest and open areas. rPD:  
896 residual phylogenetic diversity (i.e., after controlling for species richness); PSV: phylogenetic species  
897 variability; MRD: mean root distance; MDR: mean diversification rate; Mean ages: average ages of  
898 species.

899

900 Figure 5. Variation of phylogenetic metric values for Hylid frogs in tropics and extra-tropics regions.  
901 rPD: residual phylogenetic diversity (i.e., after controlling for species richness); PSV: phylogenetic  
902 species variability; MRD: mean root distance; MDR: mean diversification rate; Mean ages: average ages  
903 of species.

904

905 Figure 6. Variation of phylogenetic metric values for *Anolis* lizards in continental and insular areas. rPD:  
906 residual phylogenetic diversity (i.e., after controlling for species richness); PSV: phylogenetic species  
907 variability; MRD: mean root distance; MDR: mean diversification rate; Mean ages: average ages of  
908 species.

909



# DIVERSITY GRADIENTS

**Higher speciation**  
**Lower extinction**  
**Dispersal (out)**

**Lower speciation**  
**Higher extinction**  
**Dispersal (in)**

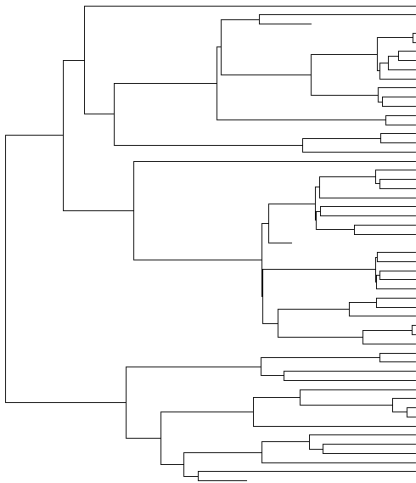

Speciation = 0.5; Extinction = 0.05

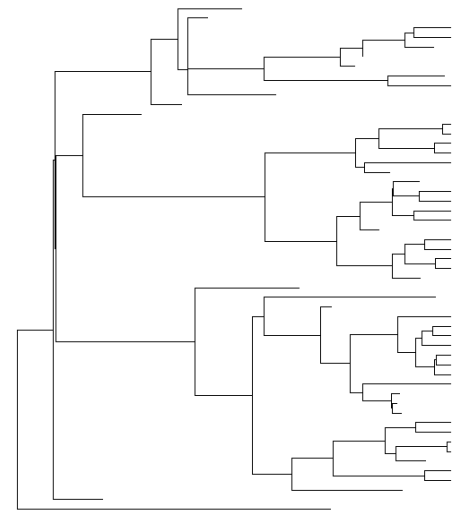

Speciation = 0.3; Extinction = 0.15

**Anolis**

(A)

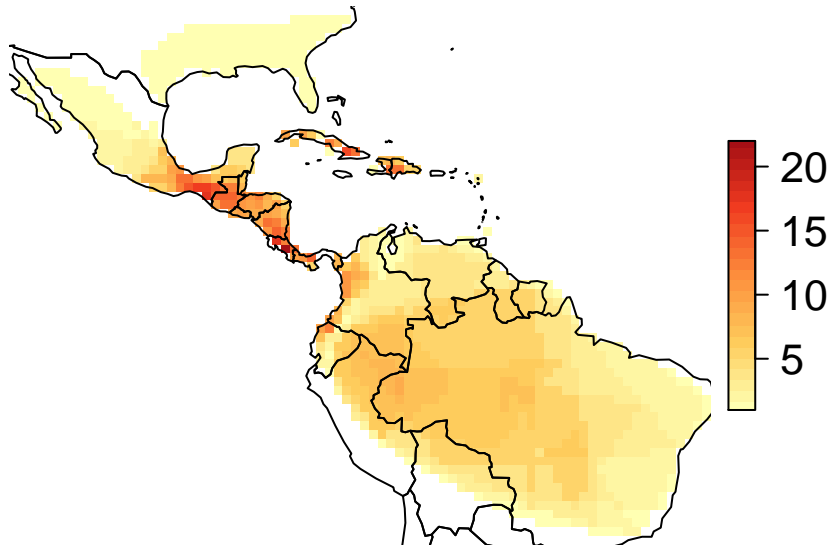**Hylids**

(B)

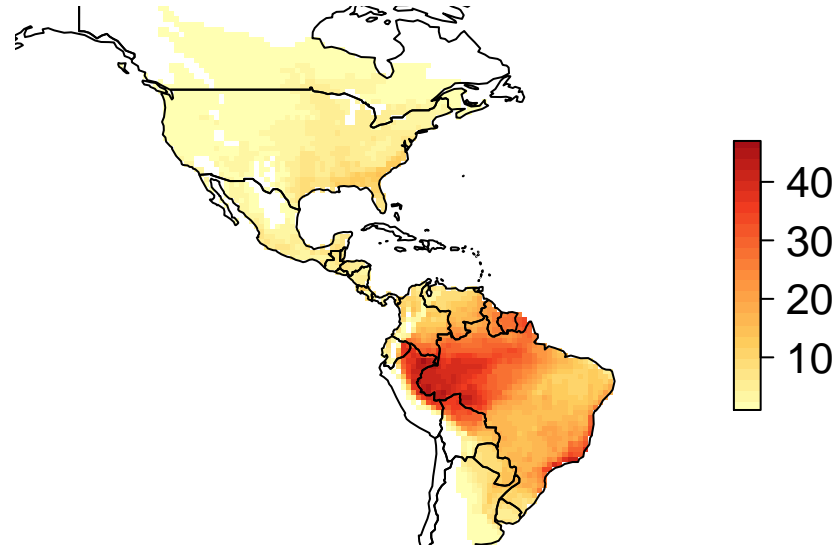**Furnariides**

(C)

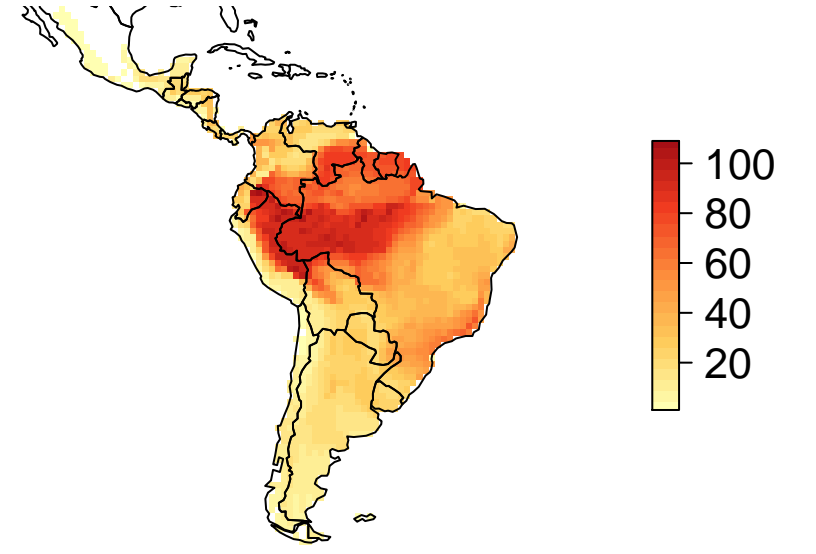

(D)

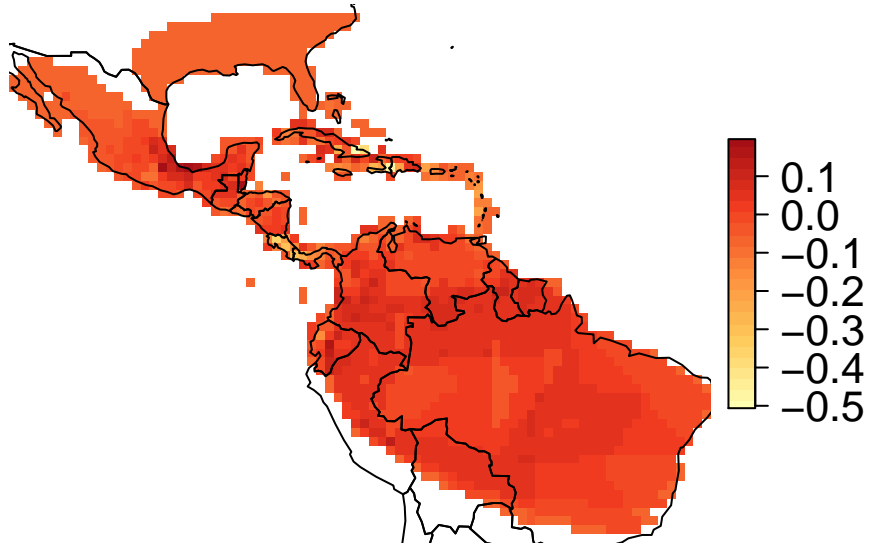

(E)

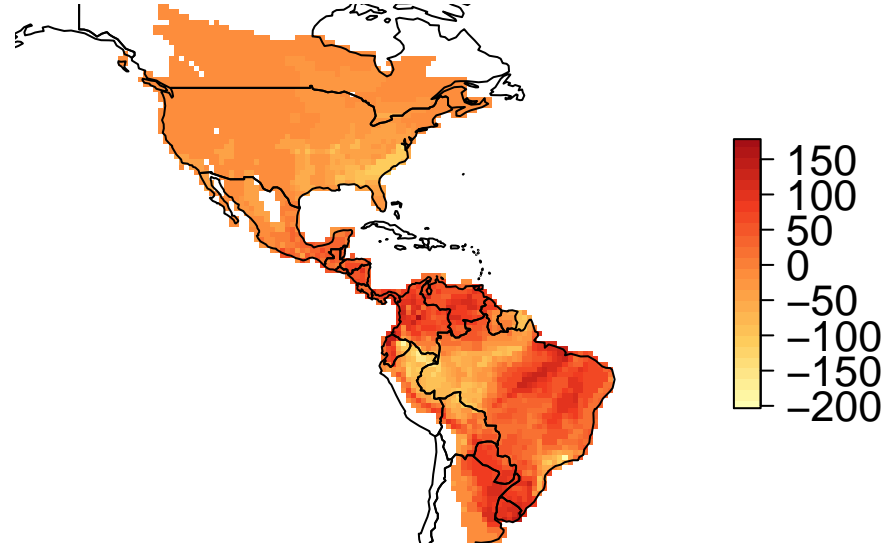

(F)

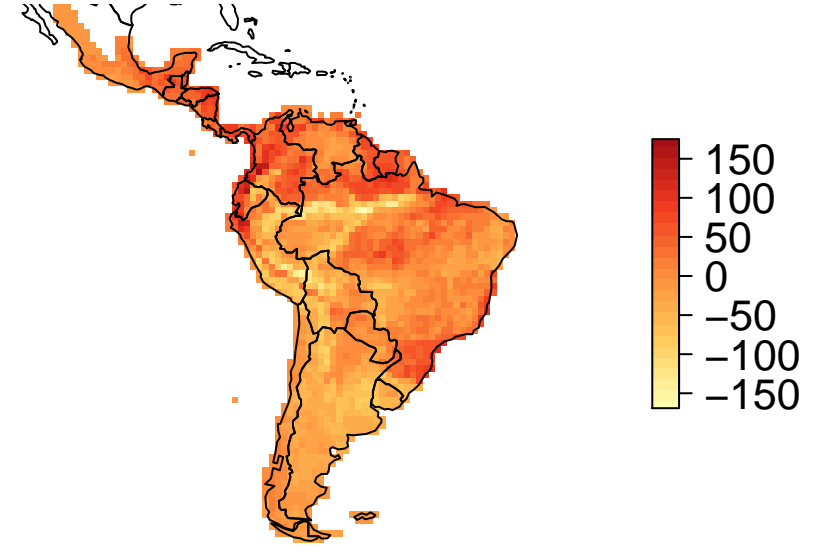

(G)

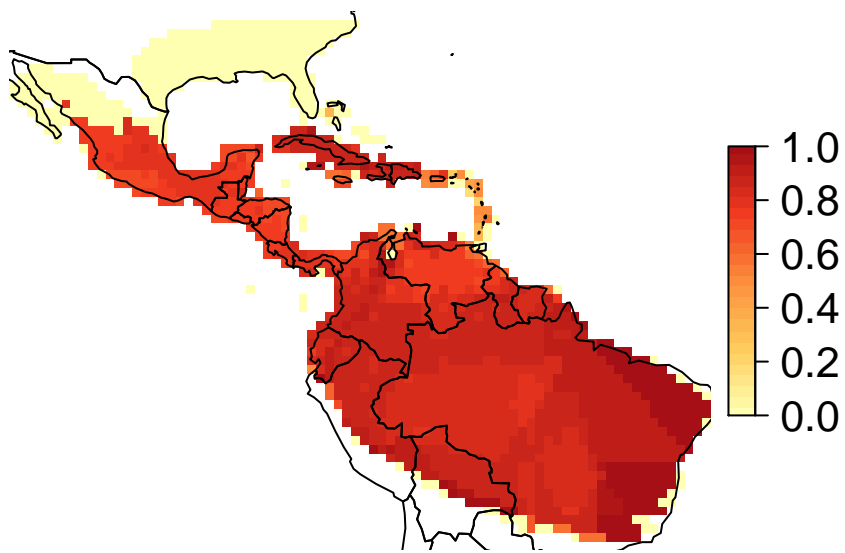

(H)

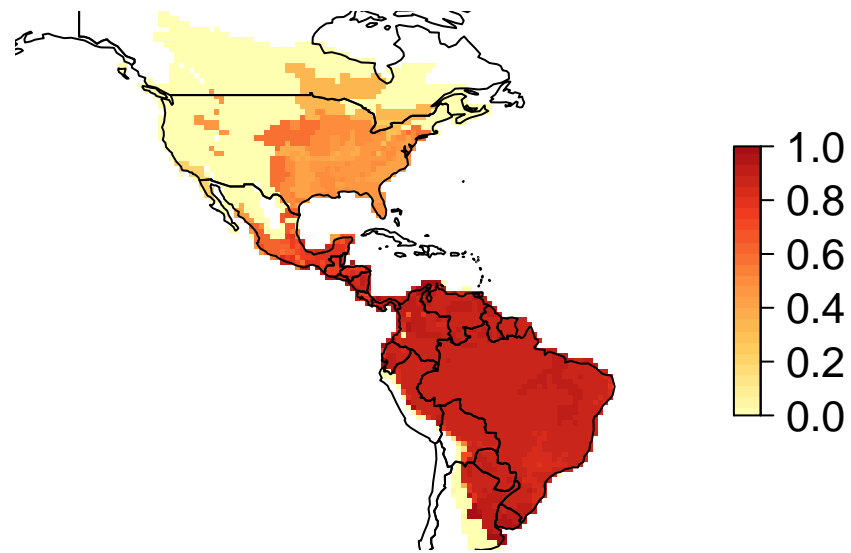

(I)

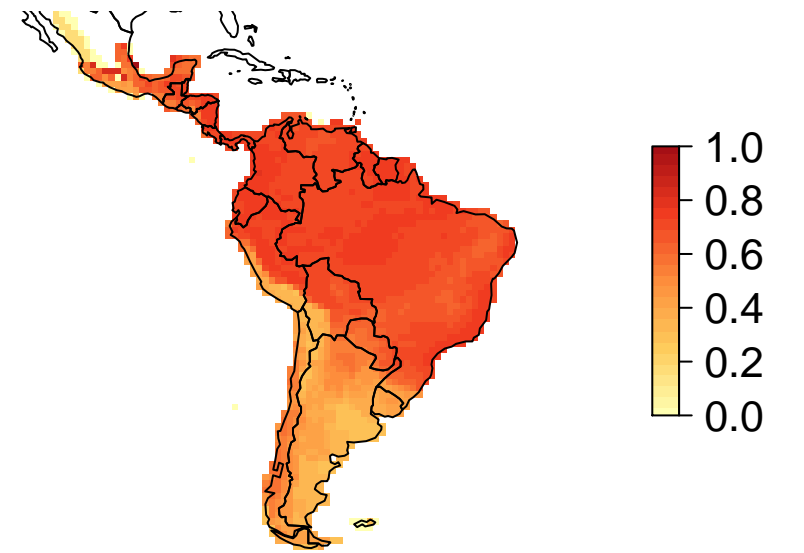

(J)

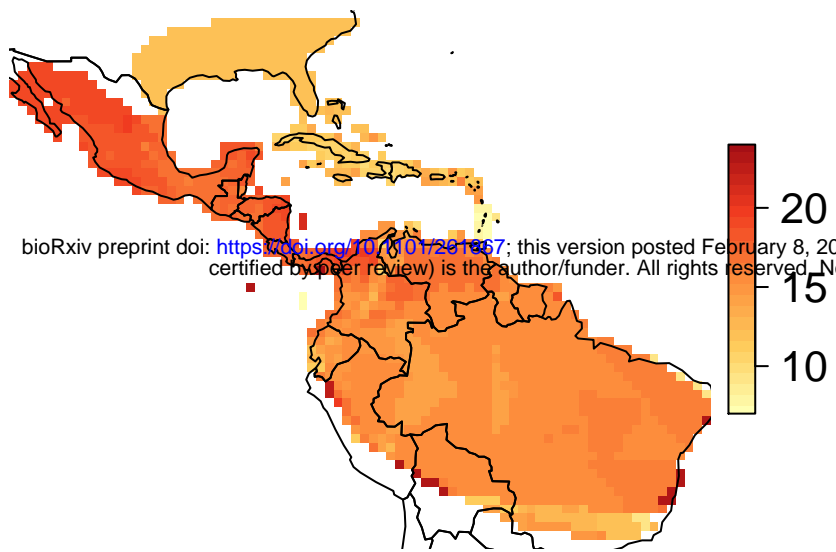

(K)

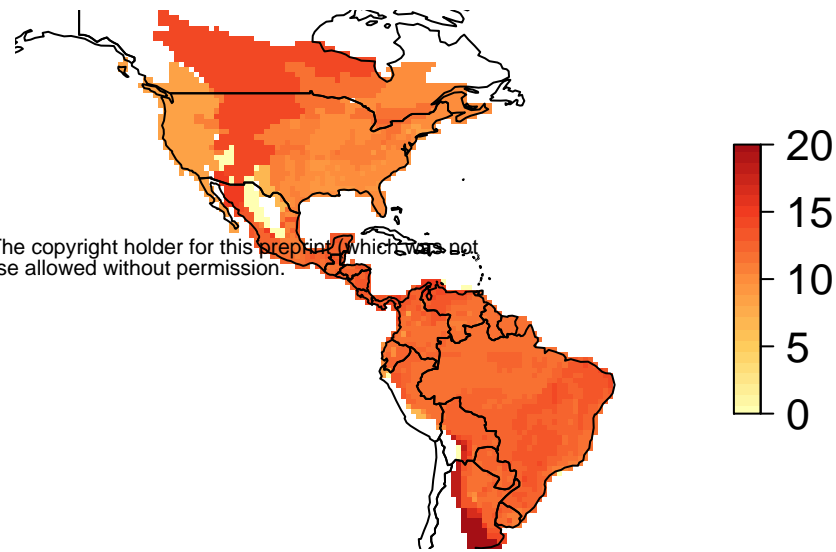

(L)

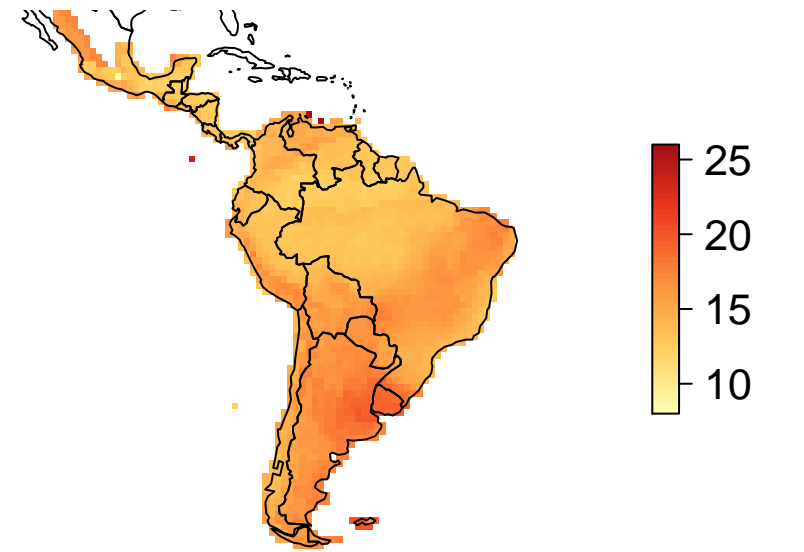

bioRxiv preprint doi: <https://doi.org/10.1101/281667>; this version posted February 8, 2018. The copyright holder for this preprint (which was not certified by peer review) is the author/funder. All rights reserved. No reuse allowed without permission.

(M)

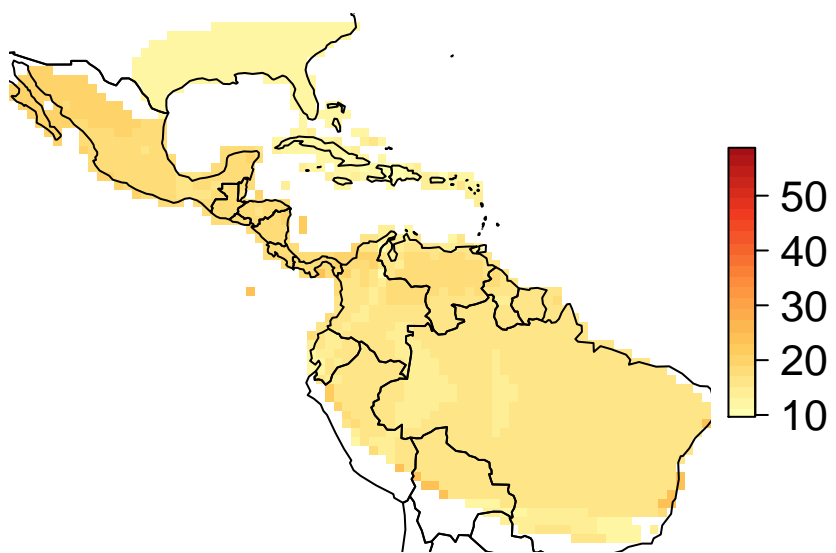

(N)

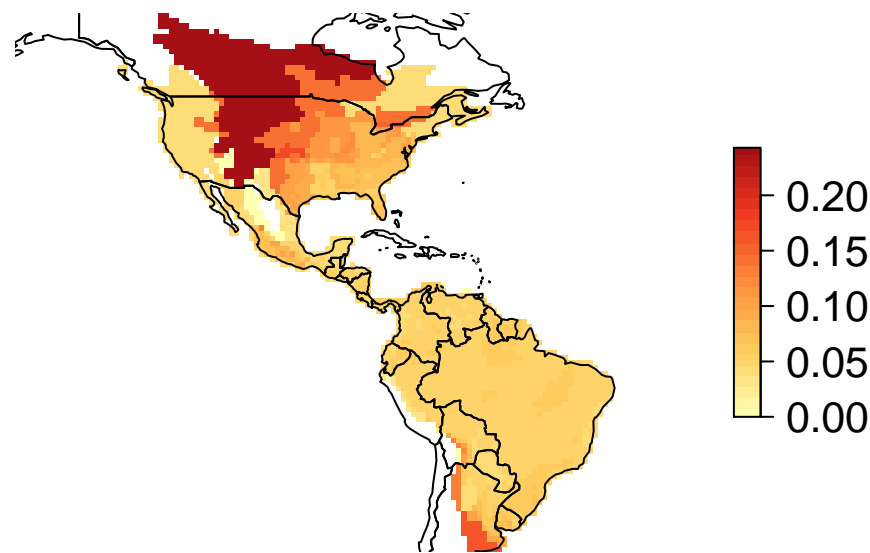

(O)

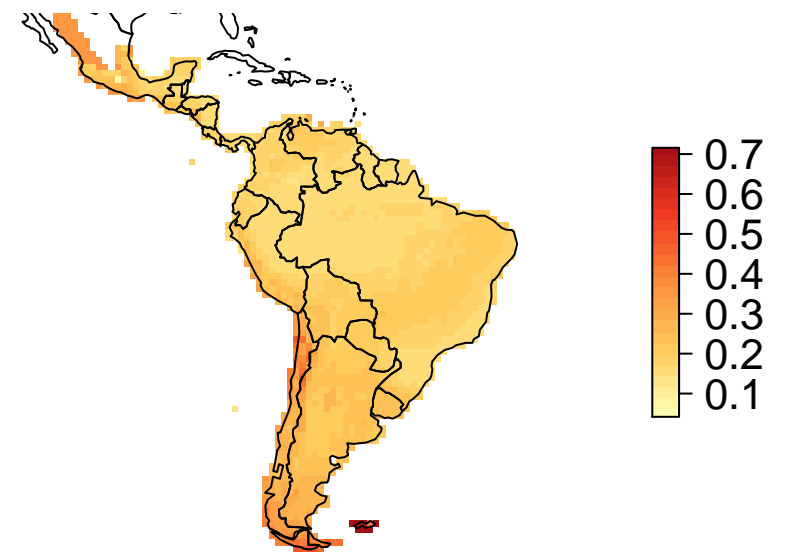

(P)

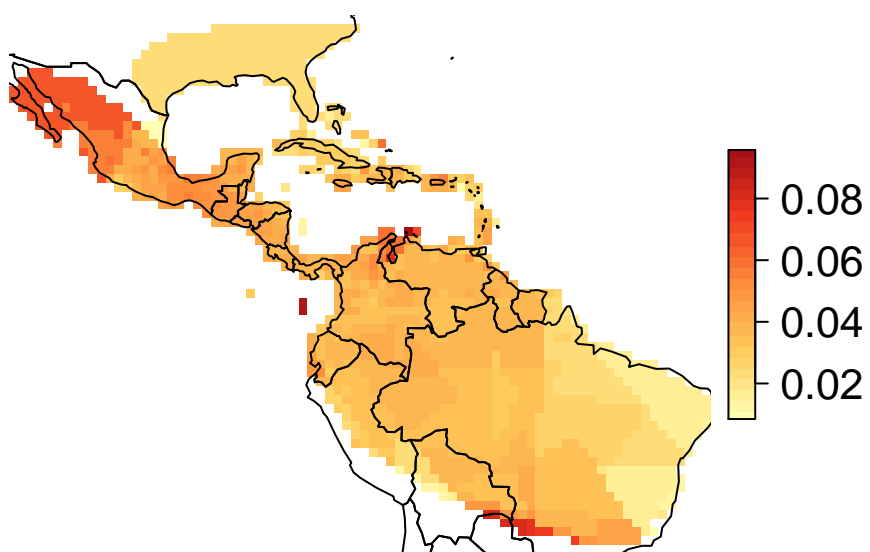

(Q)

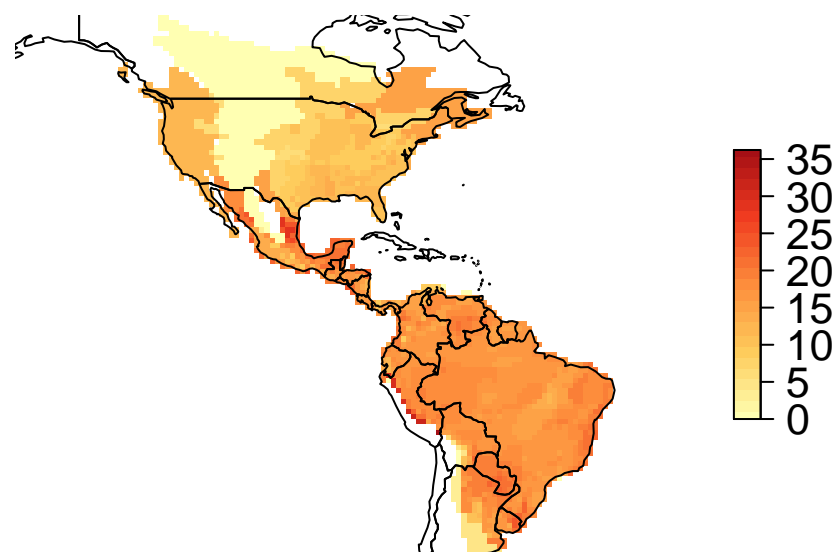

(R)

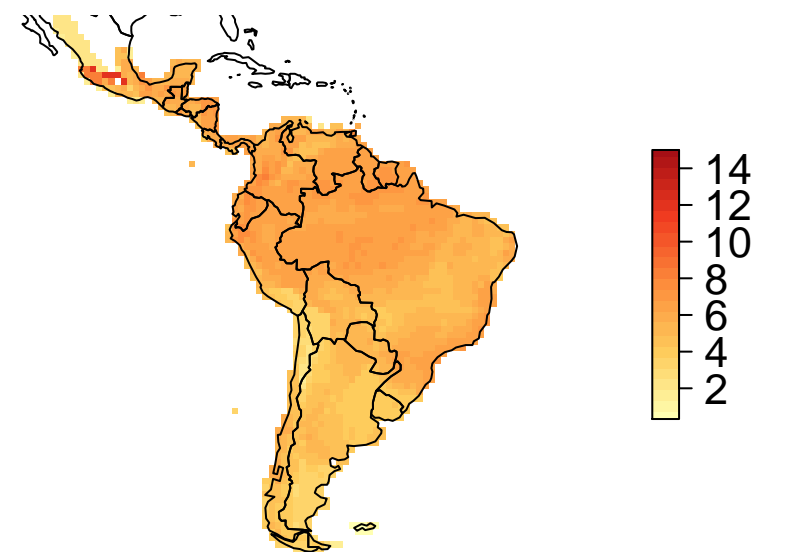

**Anolis**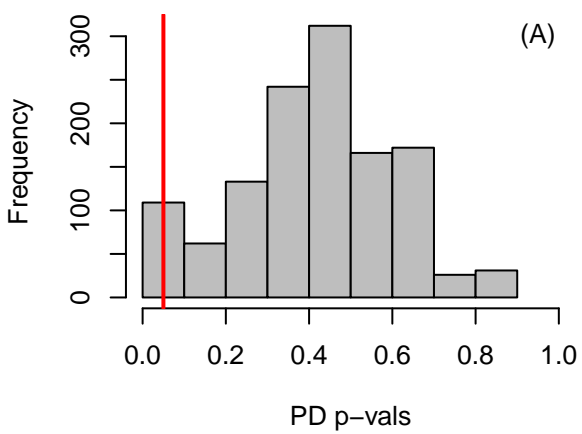**Hylids**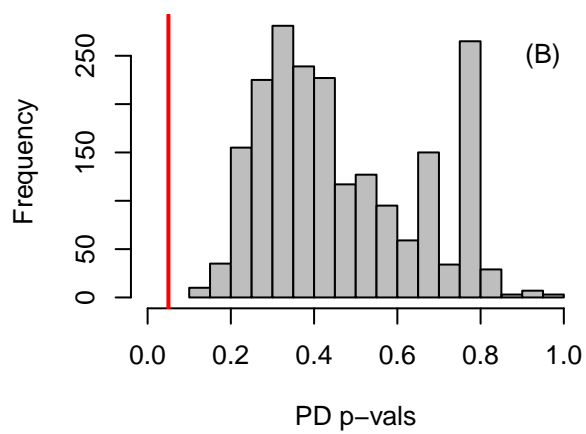**Furnariides**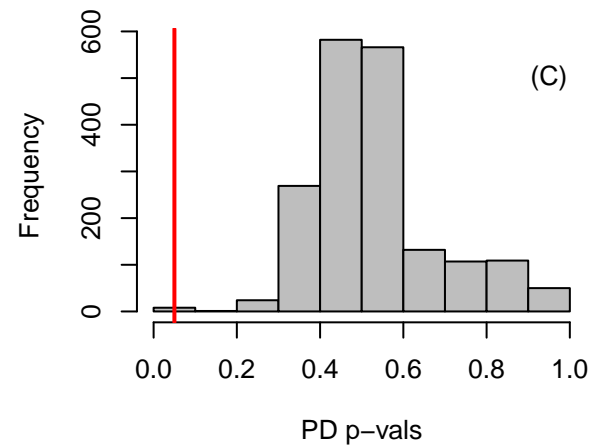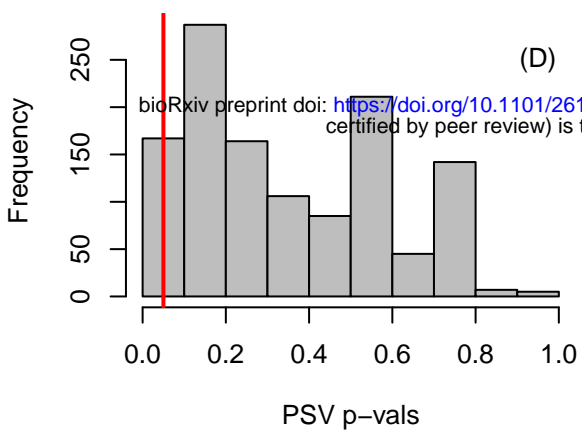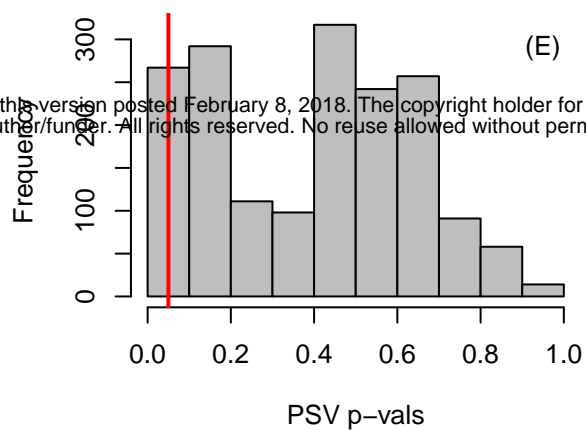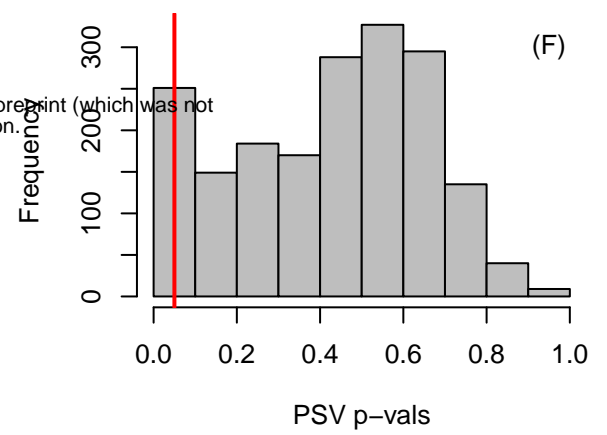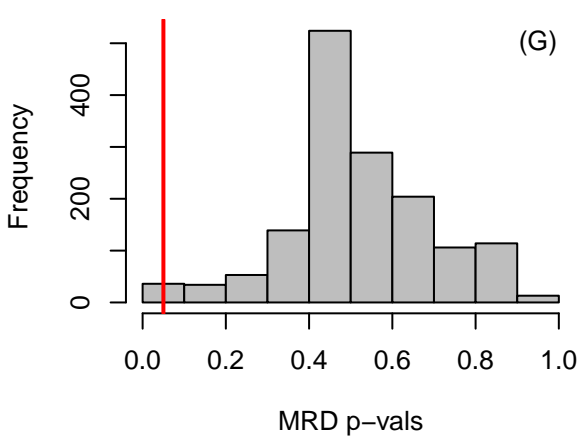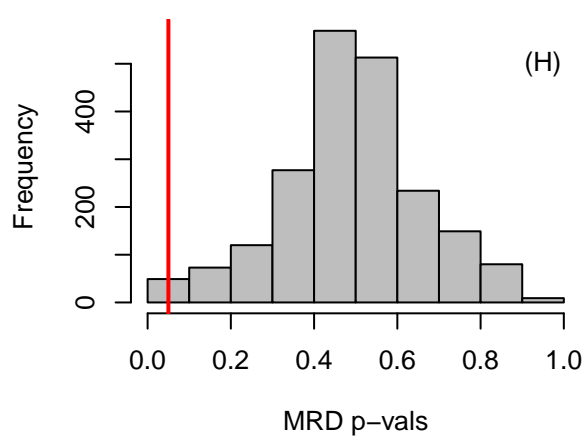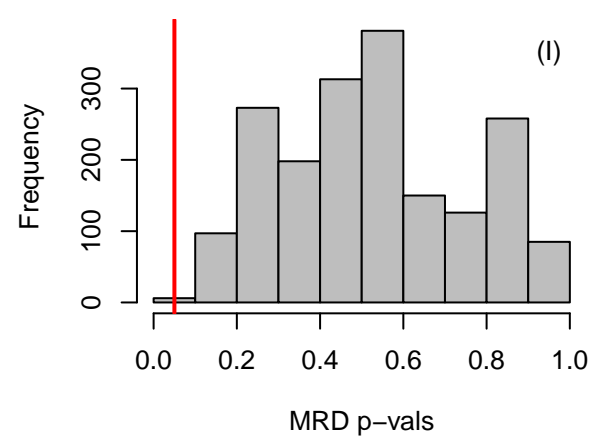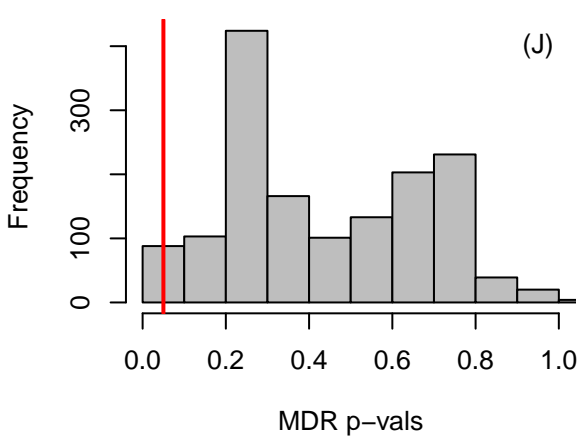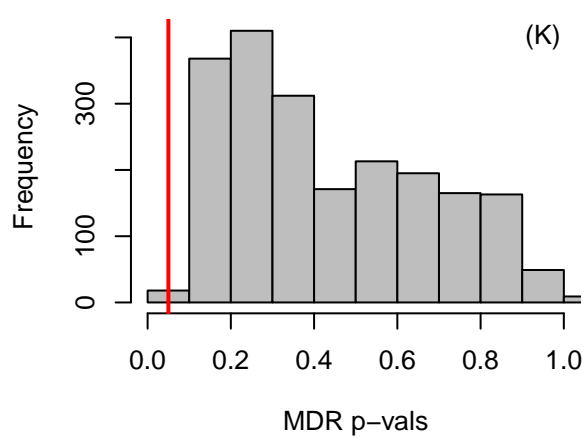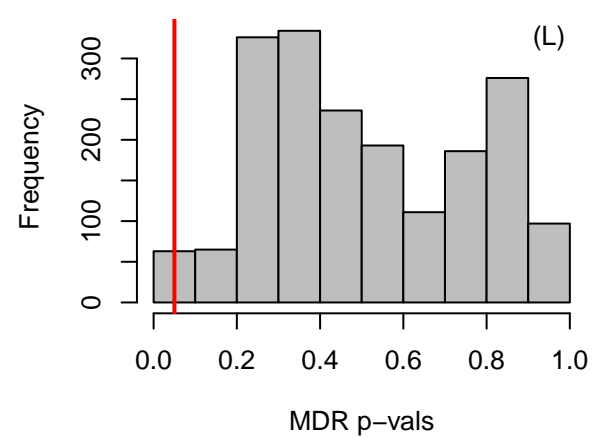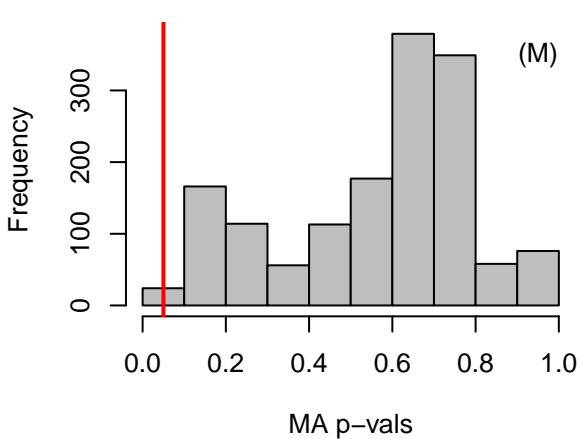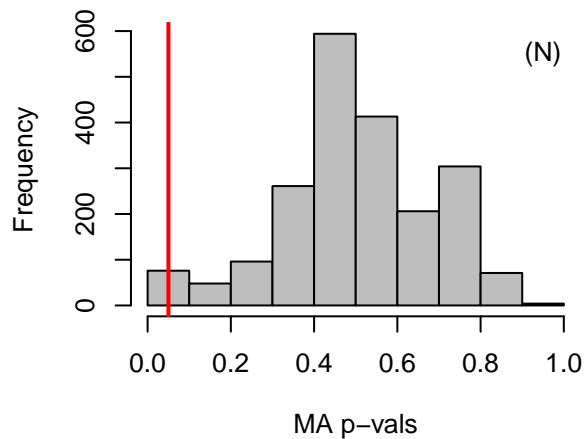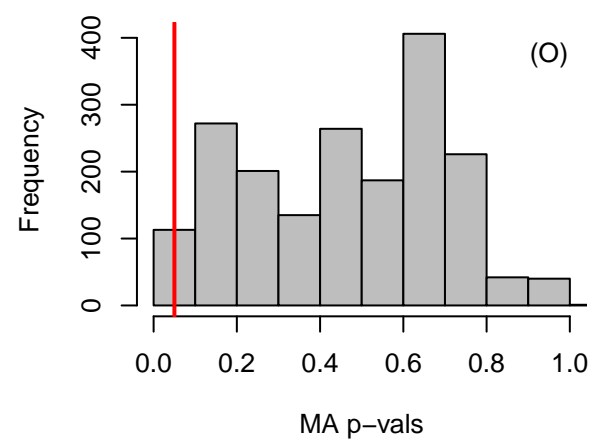

bioRxiv preprint doi: <https://doi.org/10.1101/261867>; this version posted February 8, 2018. The copyright holder for this preprint (which was not certified by peer review) is the author/funder. All rights reserved. No reuse allowed without permission.

**Richness**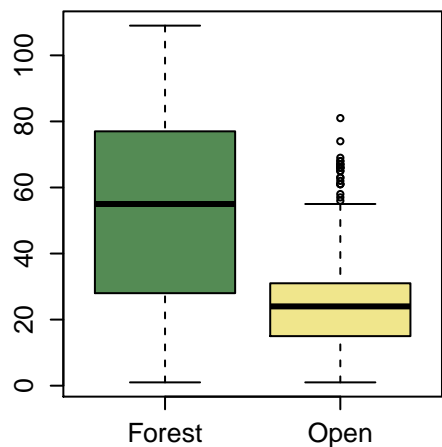**rPD**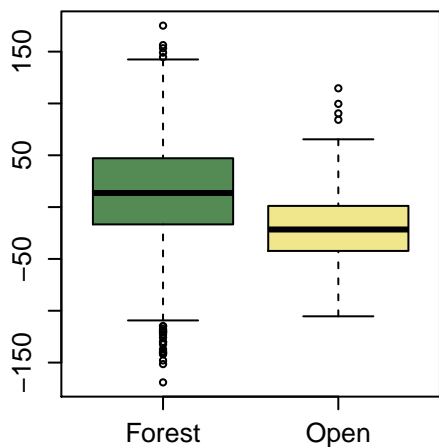**PSV**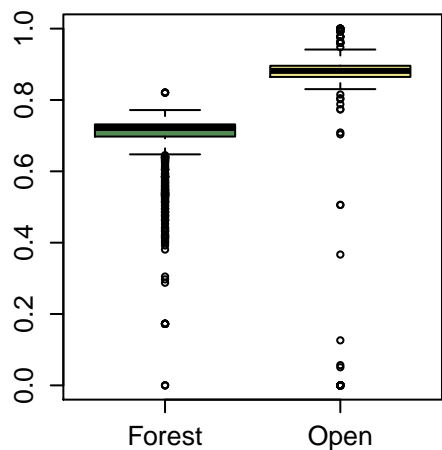**MRD**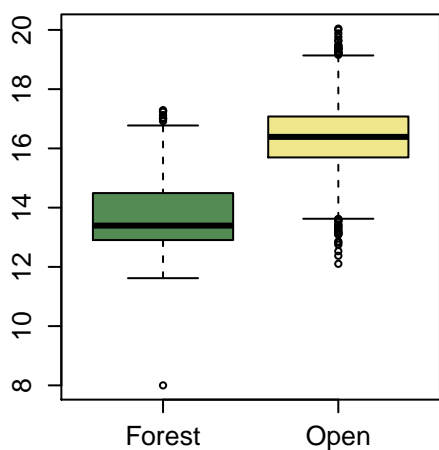**MDR**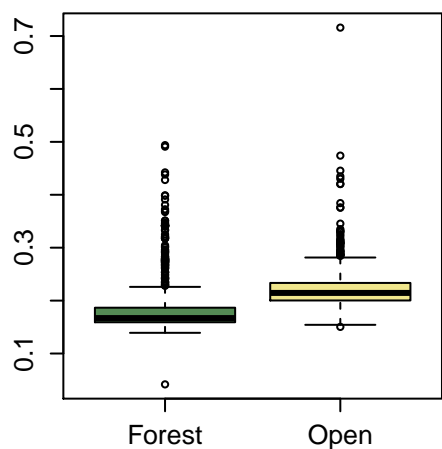**MA**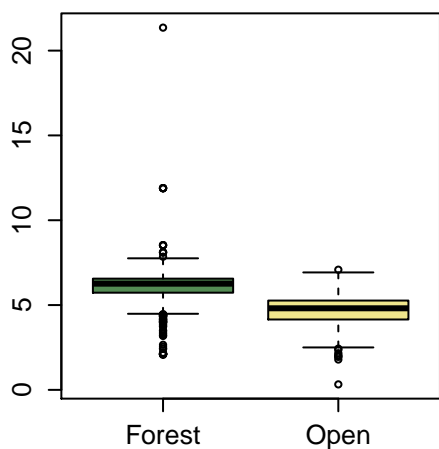

**Richness**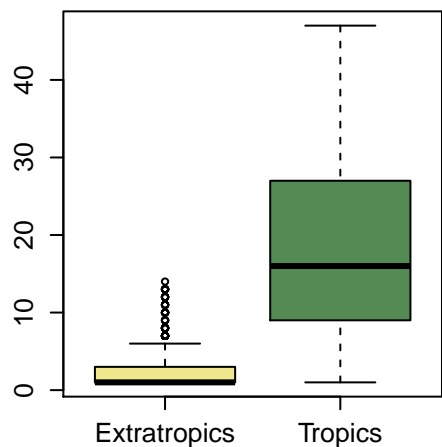**rPD**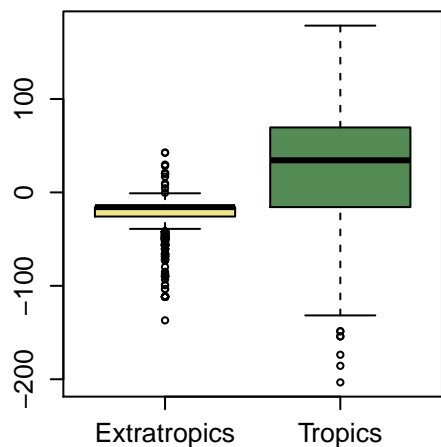**PSV**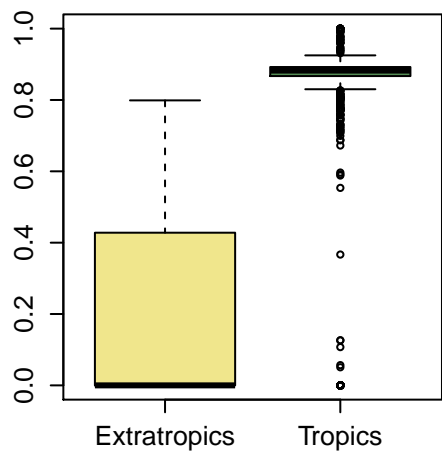**MRD**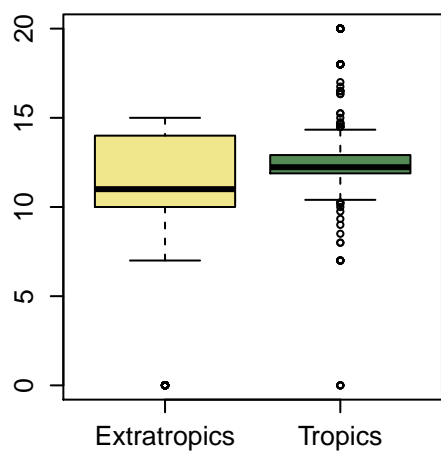**MDR**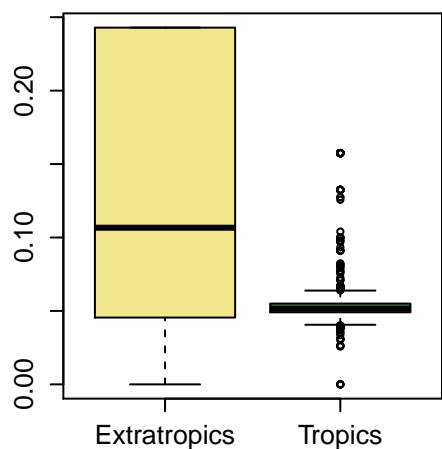**MA**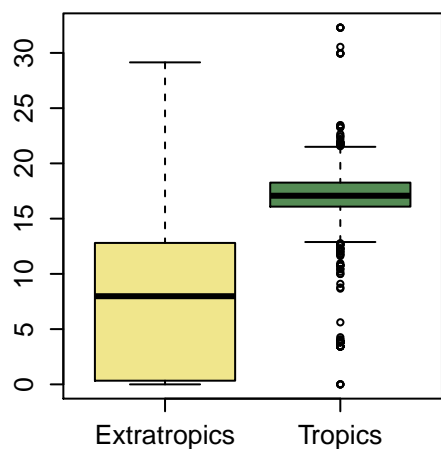

**Richness**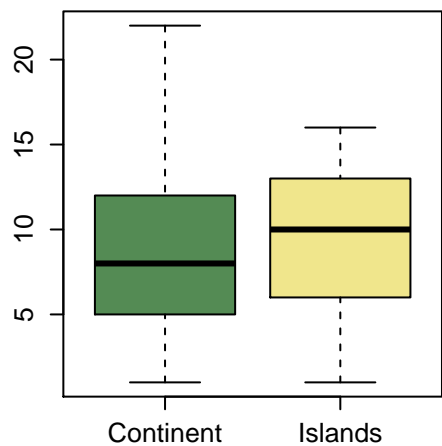**rPD**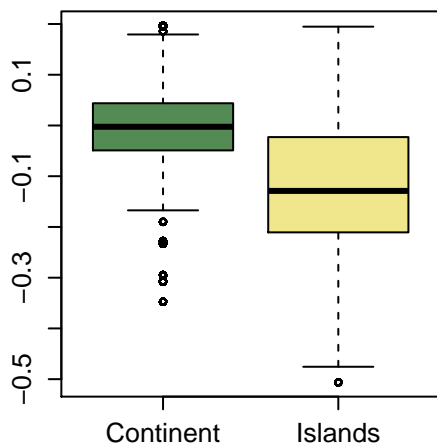**PSV**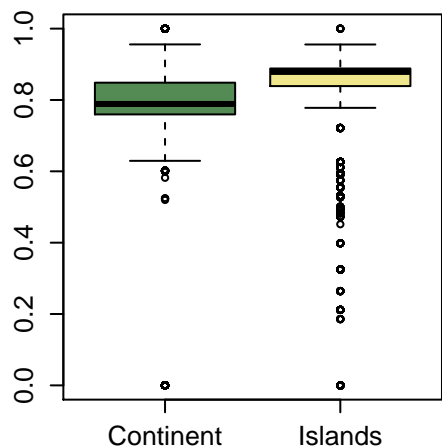**MRD**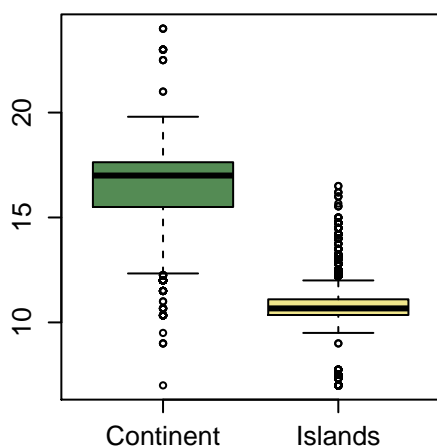**MDR**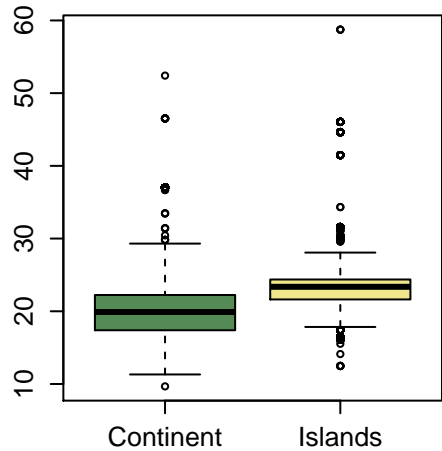**MA**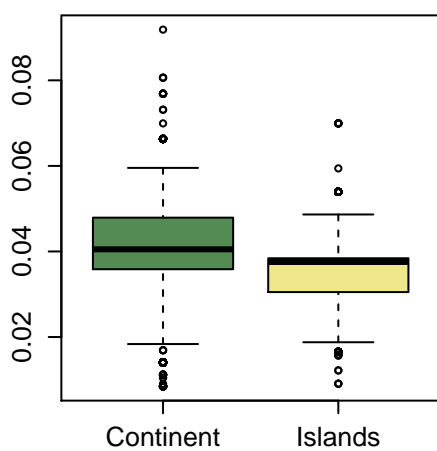

### Anolis

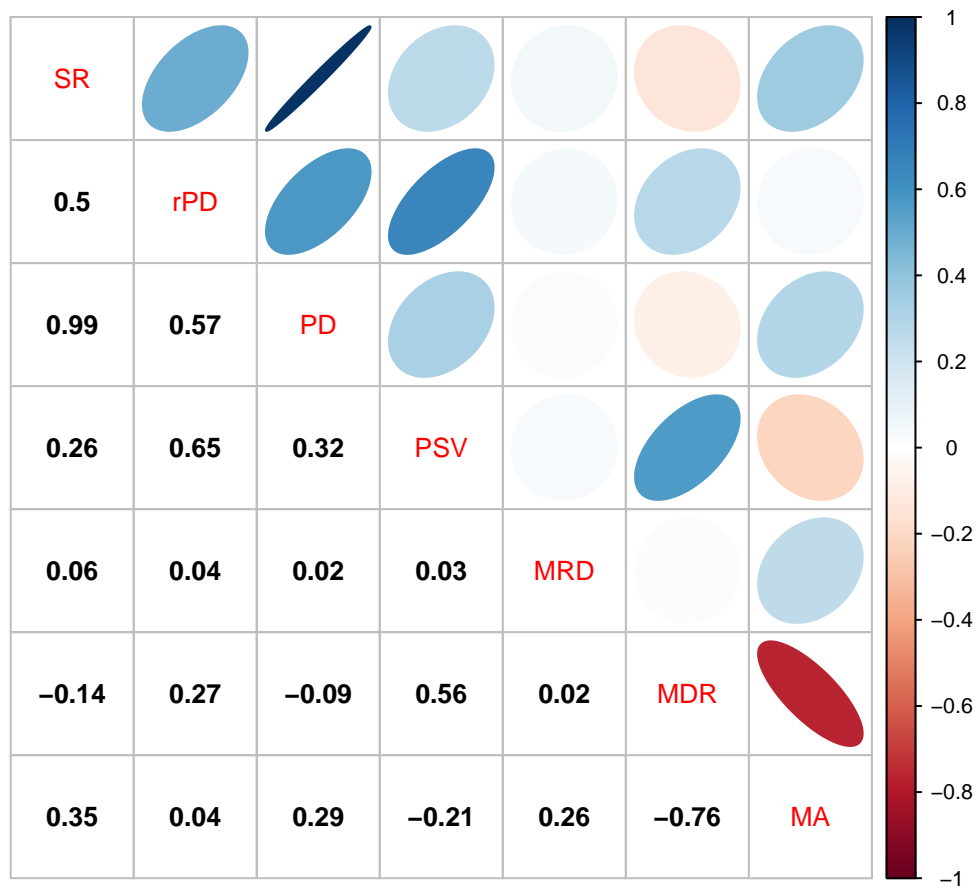

### Hylids

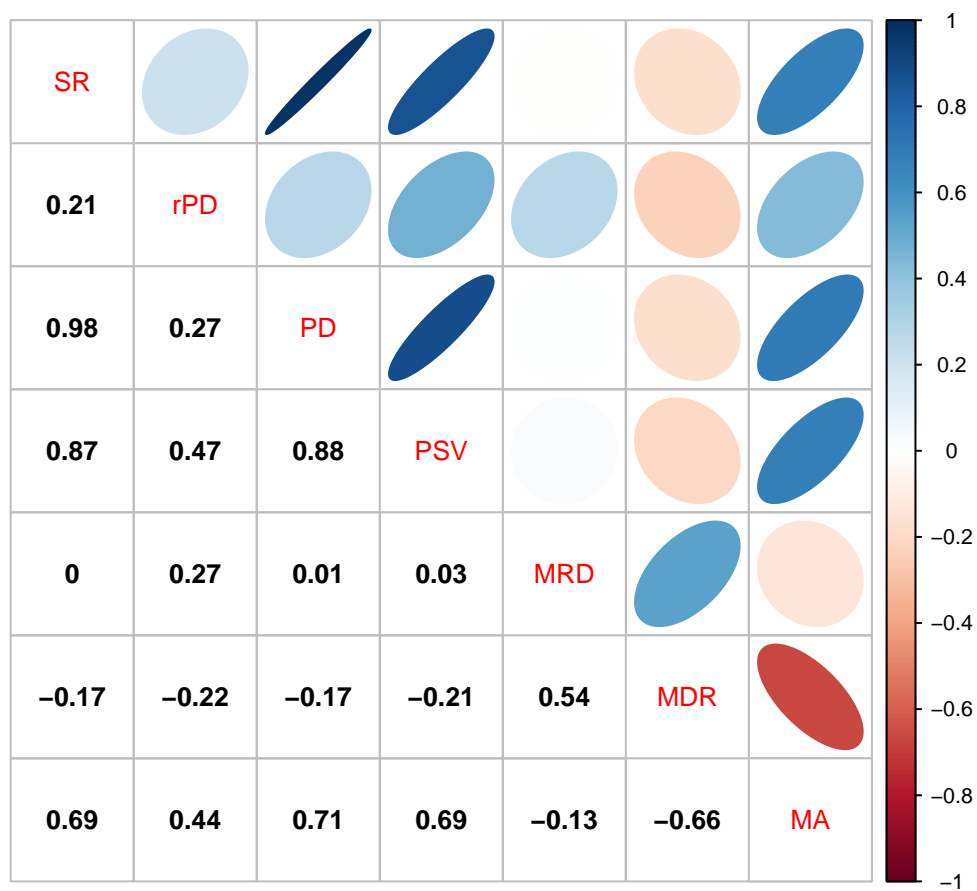

### Furnariides

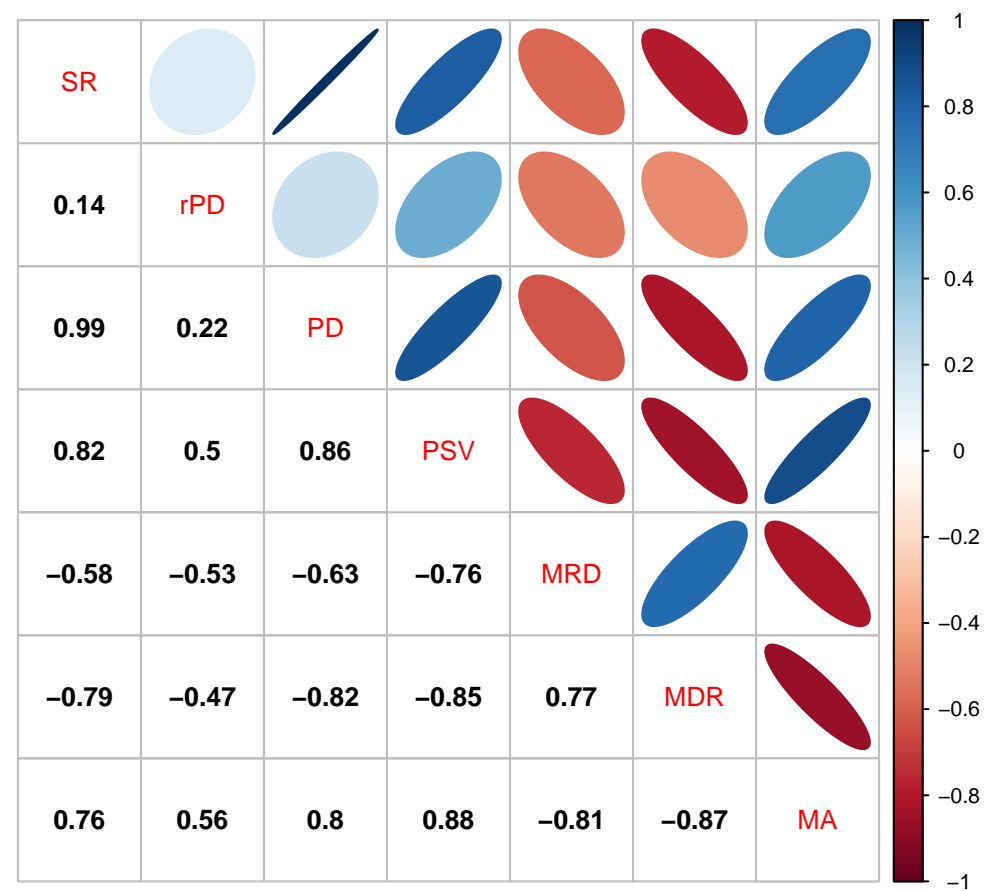

Hylid frogs

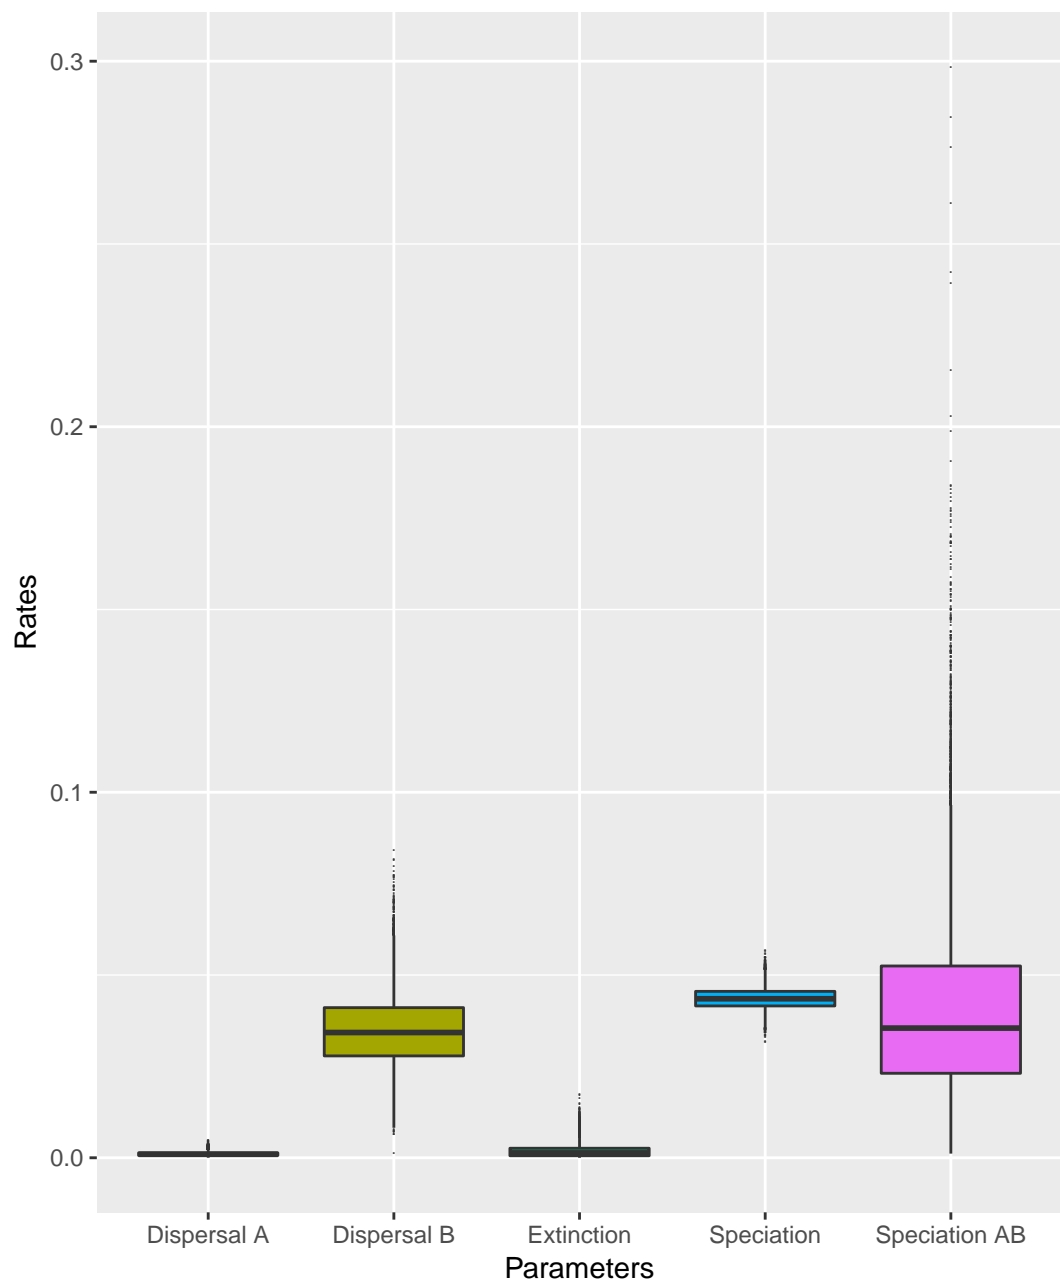

Anolis lizards

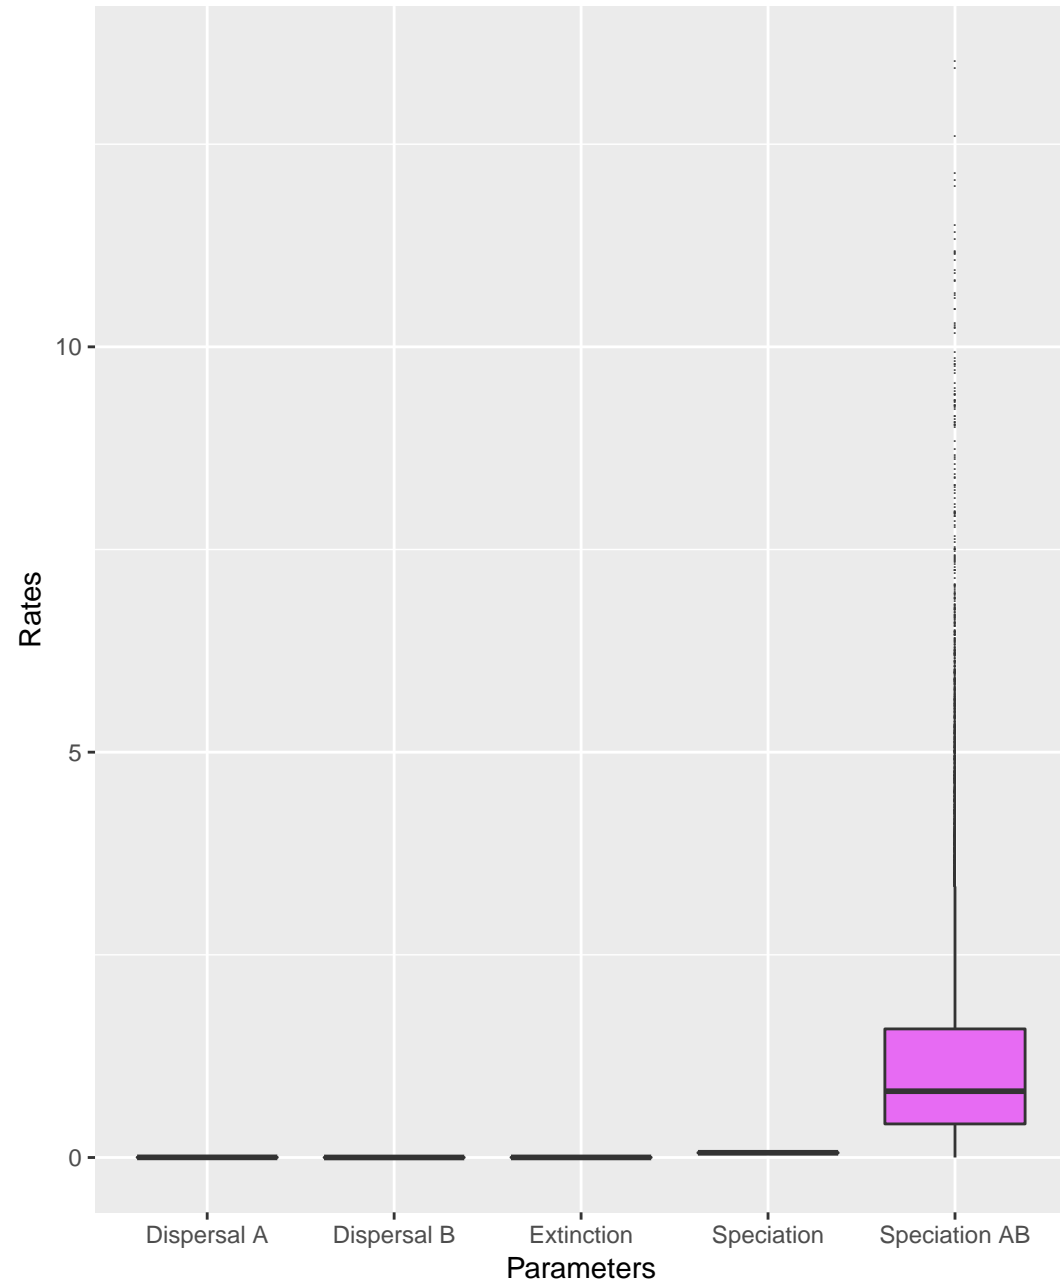

Furnariid birds

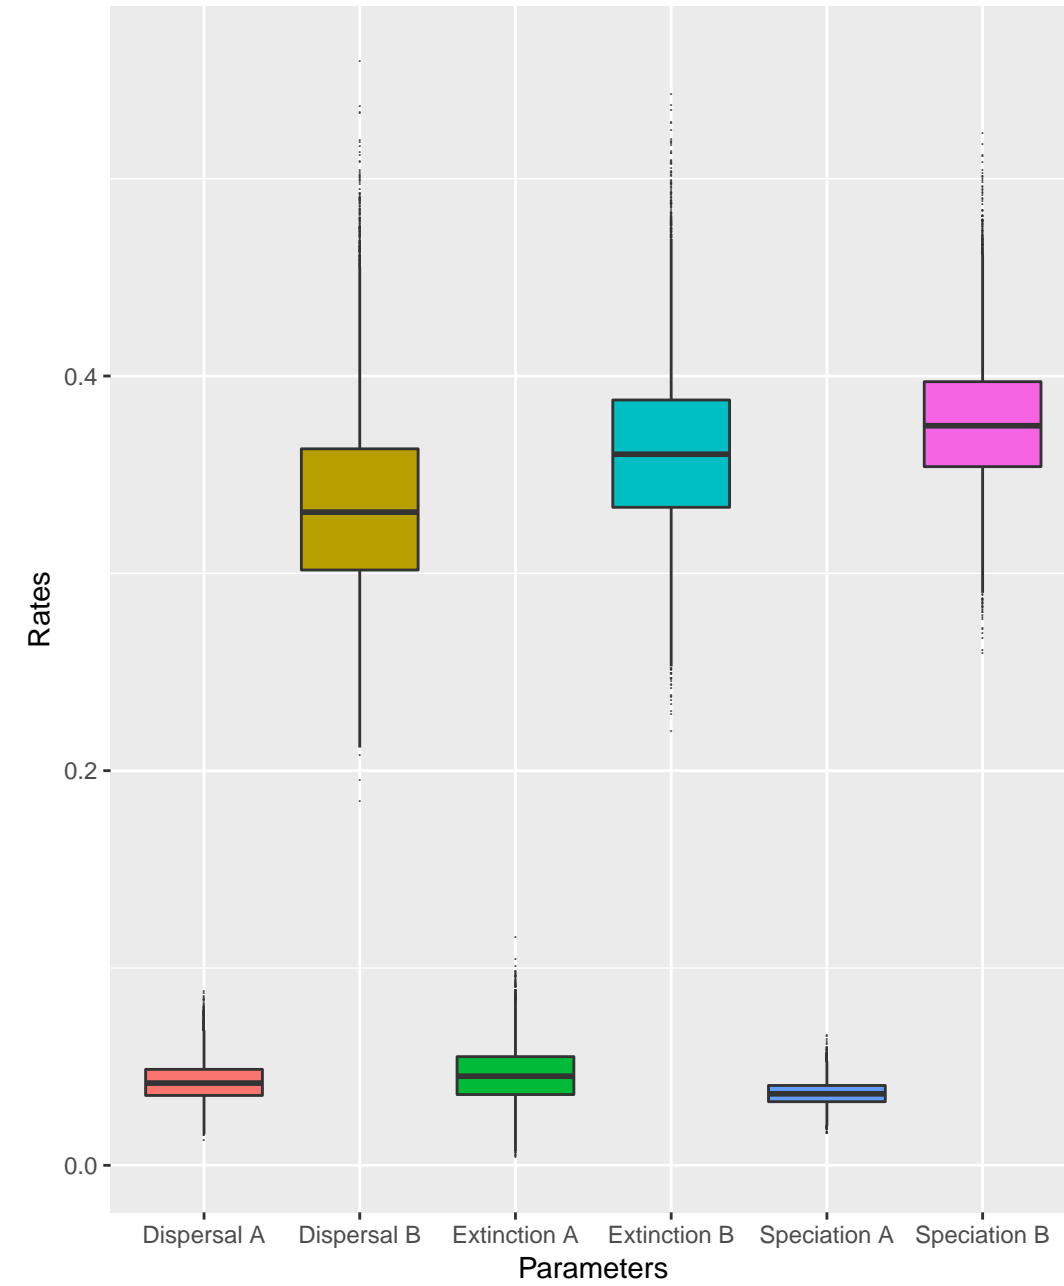



Furnariid birds

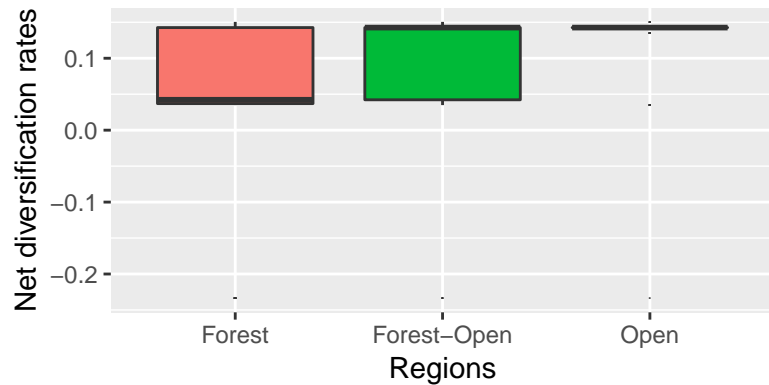

Hylid frogs

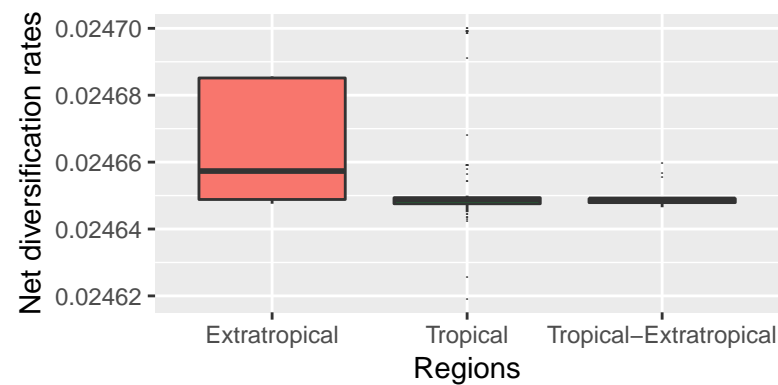

Anole lizards

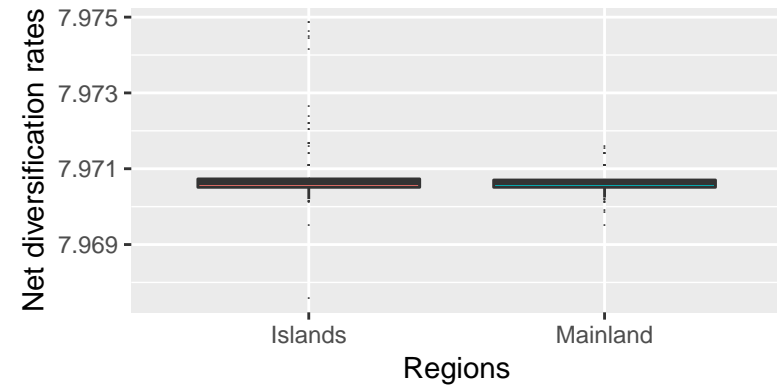

Furnariid birds

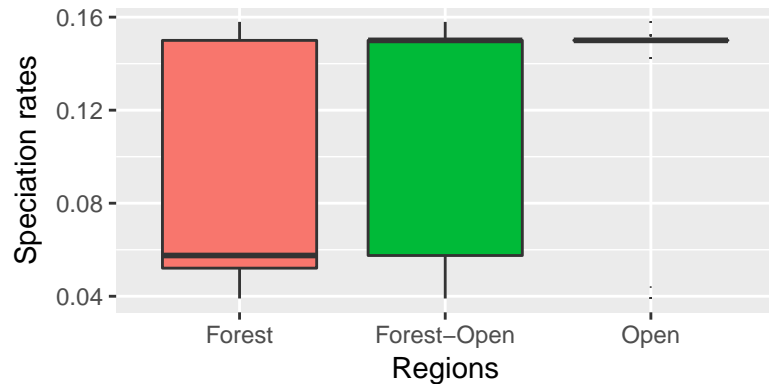

Hylid frogs

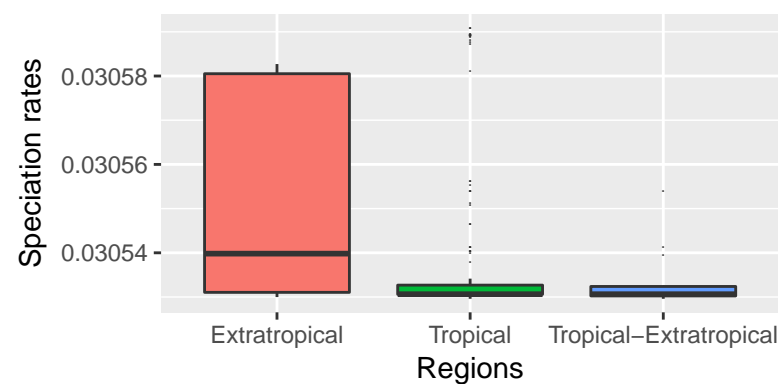

Anole lizards

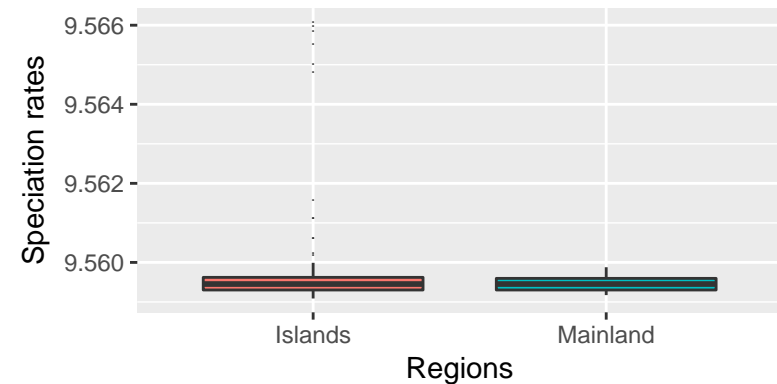

Furnariid birds

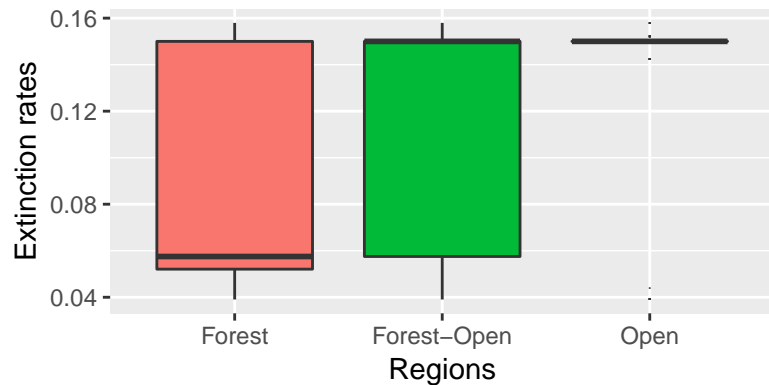

Hylid frogs

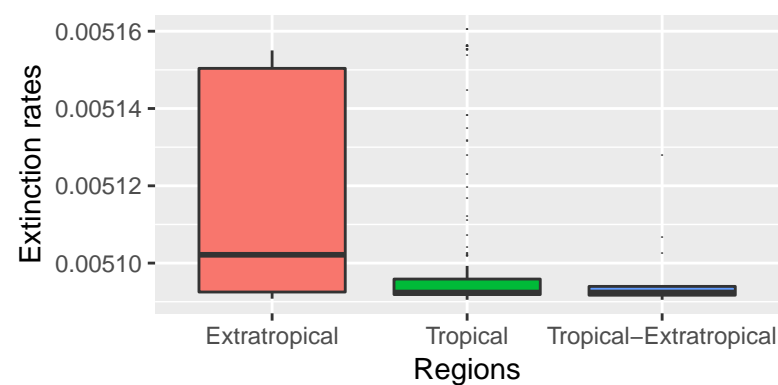

Anole lizards

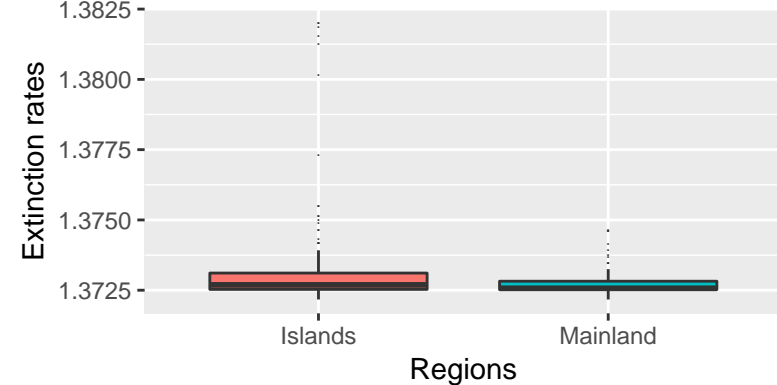

Source: http://biorxiv.org/content/10.1101/261867v2.full.pdf
